# Supplementary material for: A-site cation manipulation of exemplary second harmonic generation response and optical anisotropy in rare-earth borates
Source: Royal Society of Chemistry journal article supplement (doi:10.1039/d4sc05081a), 2024-01-01
Supplement: d4sc05081a1.pdf [file d4sc05081a1.pdf]

## Supporting Information

### **A-site cations manipulation of exemplary second harmonic generation response and optical anisotropy in rare-earth borates**

Jie Song,<sup>#,a</sup> Huijian Zhao,<sup>#,a</sup> Conggang Li,<sup>\*,a,b</sup> Ning Ye,<sup>a</sup> Zhanggui Hu,<sup>\*,a</sup> and Yicheng Wu<sup>a</sup>

<sup>a</sup>*Tianjin Key Laboratory of Functional Crystal Materials, Institute of Functional Crystal, Tianjin University of Technology, Tianjin 300384, China.*

<sup>b</sup>*State Key Laboratory of Crystal Materials, Shandong University, Jinan, 250100, China.*

**Corresponding Author** \*E-mail: [cgli@email.tjut.edu.cn](mailto:cgli@email.tjut.edu.cn) (C. L.); [hu@mail.ipc.ac.cn](mailto:hu@mail.ipc.ac.cn) (Z. H)

## EXPERIMENTAL SECTION

**Materials Preparation.** The pure-phase polycrystalline powders of the target products, namely  $K_2NaLa_2B_3O_9$  ( $K_2$ ),  $K_{2.2}Na_{0.8}La_2B_3O_9$  ( $K_{2.2}$ ),  $K_{2.4}Na_{0.6}La_2B_3O_9$  ( $K_{2.4}$ ),  $K_{2.6}Na_{0.4}La_2B_3O_9$  ( $K_{2.6}$ ),  $K_{2.8}Na_{0.2}La_2B_3O_9$  ( $K_{2.8}$ ), and  $K_3La_2B_3O_9$  ( $K_3$ ), were prepared through the traditional high-temperature solid-state method. The raw materials,  $K_2CO_3$  (Sinopharm, 99.9%),  $Na_2CO_3$  (Sinopharm, 99.9%),  $La_2O_3$  (Sinopharm, 99.9%), and  $B_2O_3$  (Sinopharm, 99.9%), were initially mixed in an agate mortar in a near-stoichiometric ratio to ensure comprehensive intermingling and uniform distribution. Subsequently, the mixture was pre-sintered in a platinum crucible at 450 °C for 24 h in a muffle furnace to remove moisture and volatile impurities, while also facilitating initial reactions among the components. Following the pre-sintering, the mixture was sintered at temperatures above 700 °C for 48 h, with multiple grinding sessions conducted during this period to ensure complete reactions. Ultimately, the desired target products were successfully synthesized.

**Powder X ray Diffraction.** The powder X-ray diffraction (XRD) pattern of the target products was recorded using the Rigaku SmartLab 9 kW diffractometer, which employed  $K\alpha$  radiation generated by a single Cu target ( $\lambda = 1.5418$  Å) as the output light source. During the testing process, the data acquisition range was set from 10° to 70° to cover the potential diffraction peaks associated with the crystal phases of the target product. Furthermore, the acquisition step width was set at 0.02° to achieve a fine scan of the XRD pattern.

**Thermal Analysis.** The thermal stability and thermal behavior characteristics of the target products were studied using thermogravimetric analysis (TG) and differential scanning calorimetry (DTA) on the NETZSCH STA 449F5 instrument. The experimental procedure involved subjecting the sample to a controlled heating process under a  $N_2$  atmosphere, with the temperature gradually increased from room temperature to 1000 °C at a constant rate of 10 °C/min.

**Crystal preparation and structural determination.**  $K_2$  and  $K_3$  single crystals were prepared using spontaneous crystallization techniques with  $B_2O_3$ - $K_2CO_3$  as a flux. To characterize their crystal structures, single-crystal XRD analysis was performed. Crystallographic data were collected using the Bruker D8 VENTURE CMOS X-ray equipped with Mo  $K\alpha$  radiation ( $\lambda=0.71073$  Å). Subsequent data corrections were made using the APEX III software, and crystal models were processed based on the SHELXTL software system, followed by refinement using the direct method.<sup>1</sup> The structural symmetries of  $K_2$  and  $K_3$  were identified utilizing the PLATON program,<sup>2</sup> providing detailed crystallographic information. All relevant data are listed in Table S2 and S3.

**Second-harmonic generation (SHG) characterization.** Using a Q-switched Nd: YAG solid-state laser operating at a wavelength of 1064 nm, the SHG response of polycrystalline powders was accurately measured following the Kurtz Perry method<sup>3</sup>. During the experiment, both the prepared samples and KDP polycrystalline powders, used as references, underwent a thorough grinding and sieving process to obtain particles with different size ranges: 25-45, 45-63, 63-74, 74-106, 106-150, and 150-210  $\mu m$ . These particles were pressed into a specialized test container with a diameter of 8 millimeters and 1 millimeter in thickness for testing purposes.

**Optical spectroscopy.** The UV-vis-NIR diffuse reflectance spectra of the obtained samples were measured at room temperature using a Hitachi UV-vis-NIR spectrophotometer, covering a wavelength range of 200-2000 nm. The experimental bandgap of the samples was determined by analyzing the Kubelka-Munk function.<sup>4</sup> Additionally, the infrared spectra of the samples within the wavelength range of 425-2000  $cm^{-1}$  were recorded using a Nicolet Is50 infrared spectrometer.

**Birefringence Properties.** The micro-birefringence characteristics of  $K_2$  and  $K_3$  crystals were experimentally assessed using a polarizing microscope (Nikon Eclipse E200MVPOL), and the thickness of the title single crystals

was determined with a Bruker SMART APEX III CCD diffractometer. The calculation of micro-birefringence was conducted based on the formula  $R = |\text{Ne} - \text{No}| \times d = \Delta n \times d$ , where  $\Delta n$ ,  $R$ , and  $d$  represent the birefringence,<sup>5</sup> optical path difference, and thickness of the crystals, respectively.

**Computational details.** A comprehensive investigation of the band structure, partial density of states (PDOS), and total density of states (TDOS) of  $\text{K}_2$  and  $\text{K}_3$  was conducted utilizing the CASTEP program.<sup>6</sup> Norm-conserving pseudopotentials were employed to accurately model the behavior of the selected valence electrons: B  $2s^2 2p^1$ , Na  $2s^2 2p^6 3s^1$ , K  $3s^2 3p^6 4s^1$ , La  $5d^1 6s^2$ , and O  $2s^2 2p^4$ . To ensure precise calculations, a plane-wave energy cutoff of 700 eV was employed. A detailed sampling and numerical integration were performed using a  $4 \times 3 \times 2$  Monkhorst-Pack  $k$ -point grid in the Brillouin zone, providing sufficient sampling in momentum space for accurate band structure. The Perdew-Burke-Ernzerhof (PBE) functional, encompassing the generalized gradient approximation (GGA), was chosen to accurately describe the exchange-correlation energy and adequately account for spatial variations in electron density.<sup>7</sup> This approach significantly enhanced the reliability and accuracy of the computational results.

Table S1 Crystal data and structural refinement parameters of K<sub>2</sub> and K<sub>3</sub>.

| empirical formula                                                 | K <sub>2</sub> NaLa <sub>2</sub> B <sub>3</sub> O <sub>9</sub>  | K <sub>3</sub> La <sub>2</sub> B <sub>3</sub> O <sub>9</sub>    |
|-------------------------------------------------------------------|-----------------------------------------------------------------|-----------------------------------------------------------------|
| formula weight                                                    | 555.44                                                          | 571.55                                                          |
| temperature                                                       | 297 K                                                           | 297 K                                                           |
| crystal system                                                    | Orthorhombic                                                    | Orthorhombic                                                    |
| space group                                                       | <i>Amm</i> 2                                                    | <i>Pnc</i> 2                                                    |
| <i>a</i> (Å)                                                      | 5.1775(4)                                                       | 6.7996(13)                                                      |
| <i>b</i> (Å)                                                      | 11.4175(10)                                                     | 16.420(3)                                                       |
| <i>c</i> (Å)                                                      | 7.2715(5)                                                       | 9.4868(17)                                                      |
| <i>Z</i>                                                          | 2                                                               | 4                                                               |
| <i>V</i> (Å <sup>3</sup> )                                        | 429.78(6)                                                       | 1059.2(3)                                                       |
| Density (g/cm <sup>3</sup> )                                      | 4.292                                                           | 3.584                                                           |
| <i>F</i> (000)                                                    | 500                                                             | 1032                                                            |
| data/restraints/parameters                                        | 613/19/56                                                       | 3015/21/188                                                     |
| <i>R</i> (int)                                                    | 0.0508                                                          | 0.0399                                                          |
| GOF ( <i>F</i> <sup>2</sup> )                                     | 1.121                                                           | 0.983                                                           |
| final <i>R</i> indices [ <i>I</i> > 2σ ( <i>I</i> )] <sup>a</sup> | <i>R</i> <sub>1</sub> = 0.0497, <i>wR</i> <sub>2</sub> = 0.1276 | <i>R</i> <sub>1</sub> = 0.0399, <i>wR</i> <sub>2</sub> = 0.0938 |
| <i>R</i> indices (all data)                                       | <i>R</i> <sub>1</sub> = 0.0500, <i>wR</i> <sub>2</sub> = 0.1279 | <i>R</i> <sub>1</sub> = 0.0518, <i>wR</i> <sub>2</sub> = 0.0960 |
| absolute structure parameter                                      | 0.03(10)                                                        | 0.07(3)                                                         |
| CCDC number                                                       | 2374500                                                         | 2374501                                                         |

<sup>a</sup>  $R_1 = \sum ||F_o| - |F_c|| / \sum |F_o|$ ;  $wR_2 = [\sum w(F_o^2 - F_c^2)^2 / \sum w(F_o^2)^2]^{1/2}$ .

Table S2. Bond lengths [Å] and angles [°] for K<sub>2</sub>.

|                  |           |                   |           |
|------------------|-----------|-------------------|-----------|
| La(1)-O(1)       | 2.466(12) | K(3)-O(3)1        | 3.044(18) |
| La(1)-O(1)       | 2.638(15) | K(3)-O(3)16       | 3.044(18) |
| La(1)-B(7)       | 2.92(2)   | Na(4)-O(1)5       | 2.666(19) |
| La(1)-O(4)       | 2.450(2)  | Na(4)-O(1)0       | 2.666(19) |
| La(1)-O(2)3      | 2.601(10) | Na(4)-B(7)15      | 3.10(3)   |
| La(1)-O(2)4      | 2.546(10) | Na(4)-O(4)9       | 2.80(2)   |
| La(1)-O(2)5      | 2.601(10) | Na(4)-O(2)        | 2.301(9)  |
| La(1)-O(2)6      | 2.546(10) | Na(4)-O(2)17      | 2.301(9)  |
| La(1)-O(3)6      | 2.687(5)  | Na(4)-O(2)18      | 2.301(9)  |
| La(1)-O(3)1      | 2.687(5)  | Na(4)-O(2)12      | 2.301(9)  |
| La(1)-B(3)6      | 3.017(14) | O(1)-B(7)         | 1.38(2)   |
| La(1)-B(3)1      | 3.017(14) | B(7)-O(4)         | 1.37(4)   |
| K(2)-Na(4)       | 3.182(10) | O(2)-B(3)         | 1.379(12) |
| K(2)-Na(4)7      | 3.182(10) | O(3)-B(3)         | 1.36(2)   |
| K(2)-O(4)8       | 2.759(9)  | O(1)-La(1)-O(1)   | 150.6(5)  |
| K(2)-O(4)9       | 2.759(9)  | O(1)-La(1)-B(7)   | 28.1(6)   |
| K(2)-O(2)10      | 2.561(11) | O(1)-La(1)-B(7)   | 178.7(6)  |
| K(2)-O(2)        | 2.561(11) | O(1)-La(1)-O(2)4  | 80.0(4)   |
| K(2)-O(2)11      | 2.561(11) | O(1)-La(1)-O(2)3  | 77.5(3)   |
| K(2)-O(2)12      | 2.561(11) | O(1)-La(1)-O(2)6  | 80.0(4)   |
| K(2)-O(3)13      | 2.501(18) | O(1)-La(1)-O(2)5  | 77.5(3)   |
| K(2)-O(3)14      | 2.501(18) | O(1)-La(1)-O(3)6  | 74.5(3)   |
| K(2)-B(3)10      | 2.91(2)   | O(1)-La(1)-O(3)6  | 103.4(4)  |
| K(2)-B(3)        | 2.91(2)   | O(1)-La(1)-O(3)1  | 74.5(3)   |
| K(3)-O(1)0       | 2.893(6)  | O(1)-La(1)-O(3)1  | 103.4(4)  |
| K(3)-O(1)5       | 2.893(6)  | O(1)-La(1)-B(3)6  | 76.3(5)   |
| K(3)-O(1)        | 2.893(6)  | O(1)-La(1)-B(3)1  | 76.3(5)   |
| K(3)-O(1)        | 2.893(6)  | O(1)-La(1)-B(3)1  | 89.0(4)   |
| K(3)-B(7)        | 2.864(16) | O(1)-La(1)-B(3)6  | 89.0(4)   |
| K(3)-B(7)15      | 2.864(16) | B(7)-La(1)-B(3)6  | 90.3(5)   |
| K(3)-O(2)11      | 3.171(11) | B(7)-La(1)-B(3)1  | 90.3(5)   |
| K(3)-O(2)        | 3.171(11) | O(4)-La(1)-O(1)   | 153.4(5)  |
| K(3)-O(2)12      | 3.171(11) | O(4)-La(1)-O(1)   | 56.0(5)   |
| K(3)-O(2)10      | 3.171(11) | O(4)-La(1)-B(7)   | 27.9(7)   |
| La(1)-O(1)       | 2.466(12) | O(4)-La(1)-O(2)3  | 80.1(4)   |
| O(4)-La(1)-O(2)5 | 80.1(4)   | O(2)6-La(1)-B(3)1 | 92.4(5)   |

---

|                    |          |                    |           |
|--------------------|----------|--------------------|-----------|
| O(4)-La(1)-O(2)4   | 121.5(4) | O(3)1-La(1)-B(7)   | 76.4(4)   |
| O(4)-La(1)-O(2)6   | 121.5(4) | O(3)6-La(1)-B(7)   | 76.4(4)   |
| O(4)-La(1)-O(3)1   | 81.6(4)  | O(3)1-La(1)-O(3)6  | 148.9(7)  |
| O(4)-La(1)-O(3)6   | 81.6(4)  | O(3)6-La(1)-B(3)1  | 139.6(6)  |
| O(4)-La(1)-B(3)6   | 104.2(4) | O(3)6-La(1)-B(3)6  | 26.9(4)   |
| O(4)-La(1)-B(3)1   | 104.2(4) | O(3)1-La(1)-B(3)1  | 26.9(4)   |
| O(2)5-La(1)-O(1)   | 126.2(3) | O(3)1-La(1)-B(3)6  | 139.6(6)  |
| O(2)6-La(1)-O(1)   | 75.4(3)  | B(3)1-La(1)-B(3)6  | 118.2(9)  |
| O(2)3-La(1)-O(1)   | 126.2(3) | Na(4)7-K(2)-Na(4)  | 108.9(5)  |
| O(2)4-La(1)-O(1)   | 75.4(3)  | O(4)8-K(2)-Na(4)   | 164.7(6)  |
| O(2)4-La(1)-B(7)   | 99.0(5)  | O(4)8-K(2)-Na(4)7  | 55.8(4)   |
| O(2)5-La(1)-B(7)   | 103.6(5) | O(4)9-K(2)-Na(4)7  | 164.7(6)  |
| O(2)6-La(1)-B(7)   | 99.0(5)  | O(4)9-K(2)-Na(4)   | 55.8(4)   |
| O(2)3-La(1)-B(7)   | 103.6(5) | O(4)9-K(2)-O(4)8   | 139.6(10) |
| O(2)4-La(1)-O(2)5  | 110.2(3) | O(4)9-K(2)-B(3)10  | 101.2(3)  |
| O(2)6-La(1)-O(2)5  | 157.4(3) | O(4)9-K(2)-B(3)    | 101.2(3)  |
| O(2)4-La(1)-O(2)6  | 65.8(4)  | O(4)8-K(2)-B(3)10  | 101.2(3)  |
| O(2)3-La(1)-O(2)5  | 64.2(4)  | O(4)8-K(2)-B(3)    | 101.2(3)  |
| O(2)4-La(1)-O(2)3  | 157.4(3) | O(2)10-K(2)-Na(4)  | 93.9(4)   |
| O(2)6-La(1)-O(2)3  | 110.2(3) | O(2)-K(2)-Na(4)7   | 93.9(4)   |
| O(2)5-La(1)-O(3)1  | 69.4(4)  | O(2)11-K(2)-Na(4)  | 93.9(4)   |
| O(2)6-La(1)-O(3)6  | 53.6(4)  | O(2)12-K(2)-Na(4)  | 45.7(2)   |
| O(2)3-La(1)-O(3)1  | 132.3(4) | O(2)-K(2)-Na(4)    | 45.7(2)   |
| O(2)4-La(1)-O(3)6  | 116.9(4) | O(2)10-K(2)-Na(4)7 | 45.7(2)   |
| O(2)4-La(1)-O(3)1  | 53.6(4)  | O(2)11-K(2)-Na(4)7 | 45.7(2)   |
| O(2)5-La(1)-O(3)6  | 132.3(4) | O(2)12-K(2)-Na(4)7 | 93.9(4)   |
| O(2)3-La(1)-O(3)6  | 69.4(4)  | O(2)11-K(2)-O(4)9  | 129.0(3)  |
| O(2)6-La(1)-O(3)1  | 116.9(4) | O(2)11-K(2)-O(4)8  | 75.3(3)   |
| O(2)5-La(1)-B(3)1  | 87.7(5)  | O(2)12-K(2)-O(4)9  | 75.3(3)   |
| O(2)4-La(1)-B(3)6  | 92.4(5)  | O(2)10-K(2)-O(4)9  | 129.0(3)  |
| O(2)4-La(1)-B(3)1  | 27.0(4)  | O(2)-K(2)-O(4)8    | 129.0(3)  |
| O(2)3-La(1)-B(3)1  | 150.8(6) | O(2)-K(2)-O(4)9    | 75.3(3)   |
| O(2)6-La(1)-B(3)6  | 27.0(4)  | O(2)10-K(2)-O(4)8  | 75.3(3)   |
| O(2)5-La(1)-B(3)6  | 150.8(6) | O(2)12-K(2)-O(4)8  | 129.0(3)  |
| O(2)3-La(1)-B(3)6  | 87.7(5)  | O(2)-K(2)-O(2)11   | 56.2(4)   |
| O(2)10-K(2)-O(2)12 | 56.2(4)  | B(3)10-K(2)-Na(4)7 | 70.8(3)   |
| O(2)-K(2)-O(2)10   | 114.2(6) | B(3)-K(2)-Na(4)7   | 70.8(3)   |

---

|                    |          |                    |           |
|--------------------|----------|--------------------|-----------|
| O(2)-K(2)-O(2)12   | 88.1(5)  | B(3)10-K(2)-B(3)   | 111.2(11) |
| O(2)10-K(2)-O(2)11 | 88.1(5)  | O(1)2-K(3)-O(1)15  | 159.4(7)  |
| O(2)12-K(2)-O(2)11 | 114.2(6) | O(1)15-K(3)-O(1)   | 127.0(4)  |
| O(2)10-K(2)-B(3)   | 105.5(6) | O(1)2-K(3)-O(1)    | 48.3(4)   |
| O(2)11-K(2)-B(3)   | 28.3(2)  | O(1)15-K(3)-O(1)10 | 48.3(4)   |
| O(2)12-K(2)-B(3)   | 105.5(6) | O(1)2-K(3)-O(1)10  | 127.0(4)  |
| O(2)-K(2)-B(3)     | 28.3(2)  | O(1)10-K(3)-O(1)   | 159.4(7)  |
| O(2)-K(2)-B(3)10   | 105.5(6) | O(1)2-K(3)-O(2)    | 134.5(4)  |
| O(2)10-K(2)-B(3)10 | 28.3(2)  | O(1)10-K(3)-O(2)12 | 64.0(3)   |
| O(2)12-K(2)-B(3)10 | 28.3(2)  | O(1)-K(3)-O(2)     | 104.0(3)  |
| O(2)11-K(2)-B(3)10 | 105.5(6) | O(1)2-K(3)-O(2)12  | 104.0(3)  |
| O(3)13-K(2)-Na(4)  | 108.3(2) | O(1)10-K(3)-O(2)11 | 134.5(4)  |
| O(3)13-K(2)-Na(4)7 | 108.3(2) | O(1)10-K(3)-O(2)10 | 104.0(3)  |
| O(3)14-K(2)-Na(4)7 | 108.3(2) | O(1)15-K(3)-O(2)   | 64.0(3)   |
| O(3)14-K(2)-Na(4)  | 108.3(2) | O(1)-K(3)-O(2)11   | 64.0(3)   |
| O(3)14-K(2)-O(4)8  | 79.2(3)  | O(1)10-K(3)-O(2)   | 91.2(3)   |
| O(3)14-K(2)-O(4)9  | 79.2(3)  | O(1)15-K(3)-O(2)11 | 104.0(3)  |
| O(3)13-K(2)-O(4)8  | 79.2(3)  | O(1)2-K(3)-O(2)10  | 64.0(3)   |
| O(3)13-K(2)-O(4)9  | 79.2(3)  | O(1)-K(3)-O(2)10   | 91.2(3)   |
| O(3)14-K(2)-O(2)   | 151.5(2) | O(1)15-K(3)-O(2)10 | 134.5(4)  |
| O(3)13-K(2)-O(2)12 | 151.5(2) | O(1)15-K(3)-O(2)12 | 91.2(3)   |
| O(3)14-K(2)-O(2)10 | 73.0(4)  | O(1)2-K(3)-O(2)11  | 91.2(3)   |
| O(3)14-K(2)-O(2)11 | 151.5(2) | O(1)-K(3)-O(2)12   | 134.5(4)  |
| O(3)13-K(2)-O(2)10 | 151.5(2) | O(1)2-K(3)-O(3)16  | 98.9(3)   |
| O(3)13-K(2)-O(2)11 | 73.0(4)  | O(1)10-K(3)-O(3)16 | 98.9(3)   |
| O(3)14-K(2)-O(2)12 | 73.0(4)  | O(1)15-K(3)-O(3)16 | 65.7(3)   |
| O(3)13-K(2)-O(2)   | 73.0(4)  | O(1)10-K(3)-O(3)1  | 65.7(3)   |
| O(3)13-K(2)-O(3)14 | 114.6(9) | O(1)-K(3)-O(3)1    | 98.9(3)   |
| O(3)13-K(2)-B(3)10 | 178.3(8) | O(1)-K(3)-O(3)16   | 65.7(3)   |
| O(3)13-K(2)-B(3)   | 67.1(7)  | O(1)15-K(3)-O(3)1  | 98.9(3)   |
| O(3)14-K(2)-B(3)10 | 67.1(7)  | O(1)2-K(3)-O(3)1   | 65.7(3)   |
| O(3)14-K(2)-B(3)   | 178.3(8) | B(7)15-K(3)-O(1)10 | 27.7(4)   |
| B(3)10-K(2)-Na(4)  | 70.8(3)  | B(7)15-K(3)-O(1)15 | 27.7(4)   |
| B(3)-K(2)-Na(4)    | 70.8(3)  | B(7)-K(3)-O(1)10   | 137.1(6)  |
| B(7)15-K(3)-O(1)2  | 137.1(6) | K(2)15-Na(4)-K(3)  | 179.7(4)  |
| B(7)-K(3)-O(1)     | 27.7(4)  | K(2)-Na(4)-K(3)15  | 179.7(4)  |
| B(7)-K(3)-O(1)15   | 137.1(6) | K(3)-Na(4)-K(3)15  | 108.3(4)  |

|                     |            |                     |           |
|---------------------|------------|---------------------|-----------|
| B(7)-K(3)-O(1)2     | 27.7(4)    | O(1)10-Na(4)-K(2)   | 121.4(2)  |
| B(7)15-K(3)-O(1)    | 137.1(6)   | O(1)10-Na(4)-K(2)15 | 121.4(2)  |
| B(7)15-K(3)-B(7)    | 129.4(13)  | O(1)15-Na(4)-K(2)15 | 121.4(2)  |
| B(7)-K(3)-O(2)11    | 88.3(6)    | O(1)15-Na(4)-K(2)   | 121.4(2)  |
| B(7)15-K(3)-O(2)11  | 131.1(5)   | O(1)10-Na(4)-K(3)   | 58.3(2)   |
| B(7)15-K(3)-O(2)    | 88.3(6)    | O(1)10-Na(4)-K(3)15 | 58.3(2)   |
| B(7)-K(3)-O(2)10    | 88.3(6)    | O(1)15-Na(4)-K(3)15 | 58.3(2)   |
| B(7)15-K(3)-O(2)10  | 131.1(5)   | O(1)15-Na(4)-K(3)   | 58.3(2)   |
| B(7)-K(3)-O(2)12    | 131.1(5)   | O(1)10-Na(4)-O(1)15 | 52.7(5)   |
| B(7)15-K(3)-O(2)12  | 88.3(6)    | O(1)10-Na(4)-B(7)15 | 26.4(2)   |
| B(7)-K(3)-O(2)      | 131.1(5)   | O(1)15-Na(4)-B(7)15 | 26.4(2)   |
| B(7)15-K(3)-O(3)1   | 72.0(5)    | O(1)10-Na(4)-O(4)9  | 153.6(2)  |
| B(7)-K(3)-O(3)16    | 72.0(5)    | O(1)15-Na(4)-O(4)9  | 153.6(2)  |
| B(7)-K(3)-O(3)1     | 72.0(5)    | B(7)15-Na(4)-K(2)15 | 125.5(3)  |
| B(7)15-K(3)-O(3)16  | 72.0(5)    | B(7)15-Na(4)-K(2)   | 125.5(3)  |
| O(2)11-K(3)-O(2)12  | 85.4(4)    | B(7)15-Na(4)-K(3)15 | 54.1(2)   |
| O(2)-K(3)-O(2)12    | 68.3(4)    | B(7)15-Na(4)-K(3)   | 54.1(2)   |
| O(2)11-K(3)-O(2)10  | 68.3(4)    | O(4)9-Na(4)-K(2)15  | 54.5(3)   |
| O(2)-K(3)-O(2)11    | 44.7(3)    | O(4)9-Na(4)-K(2)    | 54.5(3)   |
| O(2)12-K(3)-O(2)10  | 44.7(3)    | O(4)9-Na(4)-K(3)15  | 125.9(2)  |
| O(2)-K(3)-O(2)10    | 85.4(4)    | O(4)9-Na(4)-K(3)    | 125.9(2)  |
| O(3)1-K(3)-O(2)12   | 98.2(3)    | O(4)9-Na(4)-B(7)15  | 180.0     |
| O(3)16-K(3)-O(2)    | 98.2(3)    | O(2)12-Na(4)-K(2)15 | 111.9(4)  |
| O(3)1-K(3)-O(2)     | 156.81(18) | O(2)17-Na(4)-K(2)   | 111.9(4)  |
| O(3)1-K(3)-O(2)11   | 156.81(18) | O(2)-Na(4)-K(2)15   | 111.9(4)  |
| O(3)16-K(3)-O(2)10  | 156.81(18) | O(2)18-Na(4)-K(2)15 | 52.8(3)   |
| O(3)1-K(3)-O(2)10   | 98.2(3)    | O(2)-Na(4)-K(2)     | 52.8(3)   |
| O(3)16-K(3)-O(2)11  | 98.2(3)    | O(2)18-Na(4)-K(2)   | 111.9(4)  |
| O(3)16-K(3)-O(2)12  | 156.81(18) | O(2)12-Na(4)-K(2)   | 52.8(3)   |
| O(3)1-K(3)-O(3)16   | 87.5(7)    | O(2)17-Na(4)-K(2)15 | 52.8(3)   |
| K(2)-Na(4)-K(2)15   | 108.9(5)   | O(2)17-Na(4)-K(3)   | 127.2(4)  |
| K(2)-Na(4)-K(3)     | 71.4(2)    | O(2)18-Na(4)-K(3)   | 127.2(4)  |
| K(2)15-Na(4)-K(3)15 | 71.4(2)    | O(2)12-Na(4)-K(3)15 | 127.2(4)  |
| O(2)-Na(4)-K(3)     | 68.3(3)    | Na(4)7-O(1)-K(3)7   | 70.0(3)   |
| O(2)17-Na(4)-K(3)15 | 68.3(3)    | B(7)-O(1)-La(1)2    | 87.5(15)  |
| O(2)12-Na(4)-K(3)   | 68.3(3)    | B(7)-O(1)-La(1)19   | 178.6(17) |
| O(2)18-Na(4)-K(3)15 | 68.3(3)    | B(7)-O(1)-K(3)      | 74.9(6)   |



---

|                     |          |                    |            |
|---------------------|----------|--------------------|------------|
| O(2)-Na(4)-K(3)15   | 127.2(4) | B(7)-O(1)-K(3)7    | 74.9(6)    |
| O(2)-Na(4)-O(1)10   | 121.5(5) | B(7)-O(1)-Na(4)7   | 94.5(15)   |
| O(2)17-Na(4)-O(1)15 | 121.5(5) | La(1)2-B(7)-La(1)  | 113.0(12)  |
| O(2)12-Na(4)-O(1)15 | 121.5(5) | La(1)-B(7)-K(2)20  | 68.4(5)    |
| O(2)17-Na(4)-O(1)10 | 80.5(4)  | La(1)-B(7)-K(2)21  | 68.4(5)    |
| O(2)-Na(4)-O(1)15   | 80.5(4)  | La(1)2-B(7)-K(2)20 | 68.4(5)    |
| O(2)18-Na(4)-O(1)15 | 80.5(4)  | La(1)2-B(7)-K(2)21 | 68.4(5)    |
| O(2)12-Na(4)-O(1)10 | 80.5(4)  | La(1)2-B(7)-Na(4)7 | 123.5(6)   |
| O(2)18-Na(4)-O(1)10 | 121.5(5) | La(1)-B(7)-Na(4)7  | 123.5(6)   |
| O(2)18-Na(4)-B(7)15 | 101.5(4) | K(2)21-B(7)-K(2)20 | 96.1(9)    |
| O(2)-Na(4)-B(7)15   | 101.5(4) | K(3)-B(7)-La(1)    | 103.65(14) |
| O(2)17-Na(4)-B(7)15 | 101.5(4) | K(3)7-B(7)-La(1)   | 103.65(14) |
| O(2)12-Na(4)-B(7)15 | 101.5(4) | K(3)7-B(7)-La(1)2  | 103.65(14) |
| O(2)17-Na(4)-O(4)9  | 78.5(4)  | K(3)-B(7)-La(1)2   | 103.65(14) |
| O(2)18-Na(4)-O(4)9  | 78.5(4)  | K(3)-B(7)-K(2)21   | 163.4(11)  |
| O(2)12-Na(4)-O(4)9  | 78.5(4)  | K(3)-B(7)-K(2)20   | 67.2(3)    |
| O(2)-Na(4)-O(4)9    | 78.5(4)  | K(3)7-B(7)-K(2)21  | 67.2(3)    |
| O(2)18-Na(4)-O(2)12 | 157.0(9) | K(3)7-B(7)-K(2)20  | 163.4(11)  |
| O(2)-Na(4)-O(2)12   | 101.4(5) | K(3)-B(7)-K(3)7    | 129.4(13)  |
| O(2)12-Na(4)-O(2)17 | 73.9(4)  | K(3)-B(7)-Na(4)7   | 64.7(7)    |
| O(2)-Na(4)-O(2)18   | 73.9(4)  | K(3)7-B(7)-Na(4)7  | 64.7(7)    |
| O(2)-Na(4)-O(2)17   | 157.0(9) | Na(4)7-B(7)-K(2)20 | 131.9(5)   |
| O(2)18-Na(4)-O(2)17 | 101.4(5) | Na(4)7-B(7)-K(2)21 | 131.9(5)   |
| La(1)19-O(1)-La(1)2 | 93.9(4)  | O(1)-B(7)-La(1)2   | 64.4(10)   |
| La(1)19-O(1)-K(3)   | 104.5(3) | O(1)-B(7)-La(1)    | 177(2)     |
| La(1)2-O(1)-K(3)    | 110.6(3) | O(1)2-B(7)-La(1)2  | 177(2)     |
| La(1)2-O(1)-K(3)7   | 110.6(3) | O(1)2-B(7)-La(1)   | 64.4(10)   |
| La(1)19-O(1)-K(3)7  | 104.5(3) | O(1)2-B(7)-K(2)21  | 110.0(7)   |
| La(1)19-O(1)-Na(4)7 | 84.2(5)  | O(1)2-B(7)-K(2)20  | 110.0(7)   |
| La(1)2-O(1)-Na(4)7  | 178.0(5) | O(1)-B(7)-K(2)20   | 110.0(7)   |
| K(3)7-O(1)-K(3)     | 126.9(4) | O(1)-B(7)-K(2)21   | 110.0(7)   |
| Na(4)7-O(1)-K(3)    | 70.0(3)  | O(1)2-B(7)-K(3)7   | 77.3(9)    |
| O(1)-B(7)-K(3)7     | 77.3(9)  | Na(4)-O(2)-La(1)23 | 92.1(4)    |
| O(1)-B(7)-K(3)      | 77.3(9)  | Na(4)-O(2)-La(1)22 | 90.3(4)    |
| O(1)2-B(7)-K(3)     | 77.3(9)  | Na(4)-O(2)-K(2)    | 81.6(4)    |
| O(1)-B(7)-Na(4)7    | 59.2(15) | Na(4)-O(2)-K(3)    | 69.4(3)    |
| O(1)2-B(7)-Na(4)7   | 59.2(15) | B(3)-O(2)-La(1)22  | 95.9(10)   |

---

|                      |             |                      |           |
|----------------------|-------------|----------------------|-----------|
| O(1)2-B(7)-O(1)      | 118(3)      | B(3)-O(2)-La(1)23    | 119.9(12) |
| O(4)-B(7)-La(1)      | 56.5(6)     | B(3)-O(2)-K(2)       | 90.0(10)  |
| O(4)-B(7)-La(1)2     | 56.5(6)     | B(3)-O(2)-K(3)       | 77.6(10)  |
| O(4)-B(7)-K(2)21     | 48.1(5)     | B(3)-O(2)-Na(4)      | 146.8(11) |
| O(4)-B(7)-K(2)20     | 48.1(5)     | La(1)19-O(3)-La(1)22 | 148.9(7)  |
| O(4)-B(7)-K(3)       | 115.3(7)    | La(1)19-O(3)-K(3)19  | 104.9(4)  |
| O(4)-B(7)-K(3)7      | 115.3(7)    | La(1)22-O(3)-K(3)19  | 104.9(4)  |
| O(4)-B(7)-Na(4)7     | 180.0       | K(2)24-O(3)-La(1)22  | 88.6(4)   |
| O(4)-B(7)-O(1)2      | 120.8(15)   | K(2)24-O(3)-La(1)19  | 88.6(4)   |
| O(4)-B(7)-O(1)       | 120.8(15)   | K(2)24-O(3)-K(3)19   | 78.9(5)   |
| La(1)2-O(4)-La(1)    | 168.7(9)    | B(3)-O(3)-La(1)22    | 90.2(5)   |
| La(1)2-O(4)-K(2)20   | 88.06(19)   | B(3)-O(3)-La(1)19    | 90.2(5)   |
| La(1)-O(4)-K(2)21    | 88.06(19)   | B(3)-O(3)-K(2)24     | 175.4(16) |
| La(1)2-O(4)-K(2)21   | 88.06(19)   | B(3)-O(3)-K(3)19     | 105.6(14) |
| La(1)-O(4)-K(2)20    | 88.06(19)   | La(1)19-B(3)-La(1)22 | 118.2(9)  |
| La(1)2-O(4)-Na(4)21  | 84.4(4)     | La(1)22-B(3)-K(3)    | 86.5(6)   |
| La(1)-O(4)-Na(4)21   | 84.4(4)     | La(1)19-B(3)-K(3)    | 86.5(6)   |
| K(2)21-O(4)-K(2)20   | 139.6(10)   | K(2)-B(3)-La(1)22    | 118.6(3)  |
| K(2)20-O(4)-Na(4)21  | 69.8(5)     | K(2)-B(3)-La(1)19    | 118.6(3)  |
| K(2)21-O(4)-Na(4)21  | 69.8(5)     | K(2)-B(3)-K(3)       | 75.3(4)   |
| B(7)-O(4)-La(1)      | 95.6(4)     | O(2)11-B(3)-La(1)22  | 163.2(16) |
| B(7)-O(4)-La(1)2     | 95.6(4)     | O(2)11-B(3)-La(1)19  | 57.1(7)   |
| B(7)-O(4)-K(2)20     | 110.2(5)    | O(2)-B(3)-La(1)22    | 57.1(7)   |
| B(7)-O(4)-K(2)21     | 110.2(5)    | O(2)-B(3)-La(1)19    | 163.2(16) |
| B(7)-O(4)-Na(4)21    | 180.000(11) | O(2)11-B(3)-K(2)     | 61.7(9)   |
| La(1)22-O(2)-La(1)23 | 92.9(3)     | O(2)-B(3)-K(2)       | 61.7(9)   |
| La(1)22-O(2)-K(2)    | 171.7(4)    | O(2)11-B(3)-K(3)     | 77.3(9)   |
| La(1)23-O(2)-K(3)    | 159.8(3)    | O(2)-B(3)-K(3)       | 77.3(9)   |
| La(1)22-O(2)-K(3)    | 95.3(3)     | O(2)11-B(3)-O(2)     | 122.0(16) |
| K(2)-O(2)-La(1)23    | 89.3(4)     | O(3)-B(3)-La(1)22    | 62.9(6)   |
| K(2)-O(2)-K(3)       | 80.2(3)     | O(3)-B(3)-La(1)19    | 62.9(6)   |
| O(3)-B(3)-K(2)       | 173.7(18)   | O(3)-B(3)-O(2)       | 118.8(9)  |
| O(3)-B(3)-K(3)       | 111.0(17)   | O(3)-B(3)-O(2)11     | 118.8(9)  |

Symmetry transformations used to generate equivalent atoms:

#1  $x, y-1/2, z-1/2$     #2  $-x-2, -y-1, z$     #3  $x-1, -y-1, z-1$   
#4  $-x-1, y-1/2, z-1/2$     #5  $-x-1, -y-1, z-1$     #6  $x-1, y-1/2, z-1/2$   
#7  $x-1, y, z$     #8  $x, y, z+1$     #9  $x+1, y, z+1$     #10  $-x-1, -y-1, z$

#11  $-x-1,y,z$     #12  $x,-y-1,z$     #13  $-x-1,-y-1/2,z+1/2$   
#14  $x,y-1/2,z+1/2$     #15  $x+1,y,z$     #16  $-x-1,-y-1/2,z-1/2$   
#17  $-x,-y-1,z$     #18  $-x,y,z$     #19  $x,y+1/2,z+1/2$   
#20  $x,y,z-1$     #21  $x-1,y,z-1$     #22  $x+1,y+1/2,z+1/2$   
#23  $-x-1,-y-1,z+1$     #24  $x,y+1/2,z-1/2$

Table S3. Bond lengths [ $\text{\AA}$ ] and angles [ $^\circ$ ] for  $K_3$ 

|              |           |              |           |
|--------------|-----------|--------------|-----------|
| La(1)-La(3)1 | 3.511(3)  | K(1)-O(3)    | 2.80(3)   |
| La(1)-K(2)2  | 3.358(4)  | K(1)-O(3)10  | 2.779(16) |
| La(1)-O(1)   | 2.874(9)  | K(1)-O(4)    | 2.944(10) |
| La(1)-O(2)3  | 2.86(3)   | K(1)-O(4)6   | 2.791(10) |
| La(1)-O(2)   | 2.85(2)   | K(1)-O(5)9   | 3.25(3)   |
| La(1)-O(3)4  | 3.02(2)   | K(1)-O(5)4   | 2.45(2)   |
| La(1)-O(6)1  | 2.744(9)  | K(1)-O(8)    | 2.746(9)  |
| La(1)-O(7)4  | 2.734(2)  | K(1)-O(8)6   | 2.786(9)  |
| La(1)-O(8)4  | 2.722(9)  | K(1)-O(10)10 | 2.933(10) |
| La(1)-O(11)  | 2.570(10) | K(1)-B(1)10  | 3.184(13) |
| La(1)-B(4)4  | 3.021(7)  | K(1)-B(4)    | 3.019(14) |
| La(1)-O(3A)4 | 2.57(6)   | K(1)-O(3A)10 | 3.16(7)   |
| La(2)-O(1)   | 2.539(9)  | K(2)-O(1)    | 2.793(10) |
| La(2)-O(1)1  | 2.558(9)  | K(2)-O(2)11  | 2.64(2)   |
| La(2)-O(3)   | 2.592(15) | K(2)-O(6)1   | 2.802(10) |
| La(2)-O(4)   | 2.563(8)  | K(2)-O(7)4   | 2.896(3)  |
| La(2)-O(6)1  | 2.598(8)  | K(2)-O(8)4   | 2.915(9)  |
| La(2)-O(8)   | 2.412(8)  | K(2)-O(9)5   | 3.26(3)   |
| La(2)-O(10)5 | 2.433(11) | K(2)-O(10)5  | 3.075(14) |
| La(2)-O(11)  | 2.553(10) | K(2)-O(10)8  | 3.101(17) |
| La(2)-B(1)   | 3.005(13) | K(2)-O(11)5  | 3.011(10) |
| La(2)-B(3)   | 2.957(13) | K(2)-B(4)4   | 3.140(7)  |
| La(2)-B(3)1  | 2.942(13) | K(2)-O(3A)8  | 3.03(7)   |
| La(2)-O(3A)  | 2.76(5)   | K(3)-O(2)3   | 3.02(3)   |
| La(3)-La(3)6 | 0.586(3)  | K(3)-O(5)3   | 2.73(2)   |
| La(3)-O(2)4  | 2.65(3)   | K(3)-O(5)    | 2.91(2)   |
| La(3)-O(4)   | 2.526(8)  | K(3)-O(9)    | 2.78(2)   |
| La(3)-O(4)6  | 2.564(8)  | K(3)-O(10)   | 3.156(13) |
| La(3)-O(5)4  | 2.65(3)   | K(3)-O(10)1  | 3.299(16) |
| La(3)-O(6)   | 2.531(8)  | K(3)-O(11)   | 2.746(11) |
| La(3)-O(6)6  | 2.587(8)  | K(3)-O(11)1  | 2.987(12) |
| La(3)-O(7)7  | 2.376(10) | K(3)-B(1)    | 2.949(17) |
| La(3)-O(9)8  | 2.45(2)   | K(3)-B(1)1   | 2.96(2)   |
| La(3)-O(9)9  | 1.87(2)   | K(3)-B(2)    | 2.942(11) |
| La(3)-B(3)6  | 2.984(14) | K(3)-O(3A)   | 3.25(8)   |
| La(3)-B(3)   | 2.927(13) | O(1)-B(3)    | 1.362(16) |

---

|                    |            |                    |            |
|--------------------|------------|--------------------|------------|
| O(2)-O(9)3         | 1.12(4)    | O(6)1-La(1)-O(2)3  | 102.2(6)   |
| O(2)-B(2)          | 1.36(3)    | O(6)1-La(1)-O(3)4  | 154.4(3)   |
| O(3)-B(1)          | 1.40(2)    | O(6)1-La(1)-B(4)4  | 93.3(3)    |
| O(4)-B(3)          | 1.409(15)  | O(7)4-La(1)-La(3)1 | 42.5(2)    |
| O(5)-O(5)3         | 1.40(5)    | O(7)4-La(1)-K(2)2  | 147.24(9)  |
| O(5)-O(9)3         | 1.39(4)    | O(7)4-La(1)-O(1)   | 101.4(2)   |
| O(5)-B(2)          | 1.38(3)    | O(7)4-La(1)-O(2)   | 64.8(5)    |
| O(6)-B(3)          | 1.370(16)  | O(7)4-La(1)-O(2)3  | 102.9(4)   |
| O(7)-B(4)          | 1.36(2)    | O(7)4-La(1)-O(3)4  | 107.3(5)   |
| O(8)-B(4)          | 1.352(12)  | O(7)4-La(1)-O(6)1  | 71.9(3)    |
| O(9)-B(2)          | 1.32(2)    | O(7)4-La(1)-B(4)4  | 26.7(4)    |
| O(10)-B(1)         | 1.366(18)  | O(8)4-La(1)-La(3)1 | 92.75(19)  |
| O(11)-B(1)         | 1.368(19)  | O(8)4-La(1)-K(2)2  | 131.4(2)   |
| B(1)-O(3A)         | 1.30(5)    | O(8)4-La(1)-O(1)   | 72.0(3)    |
| K(2)2-La(1)-La(3)1 | 125.88(8)  | O(8)4-La(1)-O(2)   | 105.1(5)   |
| O(1)-La(1)-La(3)1  | 112.9(2)   | O(8)4-La(1)-O(2)3  | 134.2(5)   |
| O(1)-La(1)-K(2)2   | 110.06(19) | O(8)4-La(1)-O(3)4  | 62.6(5)    |
| O(1)-La(1)-O(3)4   | 81.6(3)    | O(8)4-La(1)-O(6)1  | 102.5(3)   |
| O(1)-La(1)-B(4)4   | 92.9(2)    | O(8)4-La(1)-O(7)4  | 51.0(3)    |
| O(2)-La(1)-La(3)1  | 47.9(7)    | O(8)4-La(1)-B(4)4  | 26.6(3)    |
| O(2)3-La(1)-La(3)1 | 78.1(5)    | O(11)-La(1)-La(3)1 | 108.5(3)   |
| O(2)3-La(1)-K(2)2  | 49.5(4)    | O(11)-La(1)-K(2)2  | 59.3(2)    |
| O(2)-La(1)-K(2)2   | 86.3(5)    | O(11)-La(1)-O(1)   | 69.5(3)    |
| O(2)3-La(1)-O(1)   | 152.6(5)   | O(11)-La(1)-O(2)   | 113.6(5)   |
| O(2)-La(1)-O(1)    | 160.8(7)   | O(11)-La(1)-O(2)3  | 83.3(5)    |
| O(2)-La(1)-O(2)3   | 38.2(8)    | O(11)-La(1)-O(3)4  | 104.3(5)   |
| O(2)3-La(1)-O(3)4  | 102.8(6)   | O(11)-La(1)-O(6)1  | 73.5(3)    |
| O(2)-La(1)-O(3)4   | 114.5(7)   | O(11)-La(1)-O(7)4  | 145.3(3)   |
| O(2)3-La(1)-B(4)4  | 114.5(5)   | O(11)-La(1)-O(8)4  | 140.8(3)   |
| O(2)-La(1)-B(4)4   | 80.0(5)    | O(11)-La(1)-B(4)4  | 160.2(2)   |
| O(3)4-La(1)-La(3)1 | 147.0(4)   | O(11)-La(1)-O(3A)4 | 91.3(19)   |
| O(3)4-La(1)-K(2)2  | 69.6(4)    | B(4)4-La(1)-La(3)1 | 69.2(3)    |
| O(3)4-La(1)-B(4)4  | 81.1(5)    | B(4)4-La(1)-K(2)2  | 138.81(19) |
| O(6)1-La(1)-La(3)1 | 45.73(17)  | O(3A)4-La(1)-O(1)  | 78.7(12)   |
| O(6)1-La(1)-K(2)2  | 125.2(2)   | O(3A)4-La(1)-O(2)  | 119.3(14)  |
| O(6)1-La(1)-O(1)   | 73.7(3)    | O(1)-La(2)-O(1)1   | 137.36(6)  |
| O(6)1-La(1)-O(2)   | 88.8(7)    | O(1)1-La(2)-O(3)   | 96.7(7)    |

---

---

|                   |           |                    |           |
|-------------------|-----------|--------------------|-----------|
| O(1)-La(2)-O(3)   | 107.9(5)  | O(8)-La(2)-B(3)1   | 109.1(3)  |
| O(1)-La(2)-O(4)   | 55.8(3)   | O(8)-La(2)-O(3A)   | 76.0(11)  |
| O(1)1-La(2)-O(4)  | 160.7(3)  | O(10)5-La(2)-O(1)1 | 84.5(4)   |
| O(1)-La(2)-O(6)1  | 82.0(3)   | O(10)5-La(2)-O(1)  | 88.8(4)   |
| O(1)1-La(2)-O(6)1 | 55.3(3)   | O(10)5-La(2)-O(3)  | 152.0(4)  |
| O(1)-La(2)-O(11)  | 75.4(3)   | O(10)5-La(2)-O(4)  | 81.5(4)   |
| O(1)-La(2)-B(1)   | 93.5(5)   | O(10)5-La(2)-O(6)1 | 80.6(3)   |
| O(1)1-La(2)-B(1)  | 92.8(5)   | O(10)5-La(2)-O(11) | 153.5(3)  |
| O(1)1-La(2)-B(3)1 | 27.6(3)   | O(10)5-La(2)-B(1)  | 177.3(6)  |
| O(1)-La(2)-B(3)   | 27.4(3)   | O(10)5-La(2)-B(3)  | 86.0(5)   |
| O(1)1-La(2)-B(3)  | 162.4(3)  | O(10)5-La(2)-B(3)1 | 81.7(4)   |
| O(1)-La(2)-B(3)1  | 109.8(3)  | O(10)5-La(2)-O(3A) | 152.5(12) |
| O(1)1-La(2)-O(3A) | 81.1(17)  | O(11)-La(2)-O(1)1  | 92.8(3)   |
| O(1)-La(2)-O(3A)  | 117.4(13) | O(11)-La(2)-O(3)   | 54.5(4)   |
| O(3)-La(2)-O(6)1  | 122.9(6)  | O(11)-La(2)-O(4)   | 105.7(4)  |
| O(3)-La(2)-B(1)   | 27.7(5)   | O(11)-La(2)-O(6)1  | 76.3(3)   |
| O(3)-La(2)-B(3)1  | 111.7(7)  | O(11)-La(2)-B(1)   | 27.0(4)   |
| O(3)-La(2)-B(3)   | 98.6(7)   | O(11)-La(2)-B(3)   | 89.0(4)   |
| O(4)-La(2)-O(3)   | 89.6(7)   | O(11)-La(2)-B(3)1  | 83.8(4)   |
| O(4)-La(2)-O(6)1  | 134.2(3)  | O(11)-La(2)-O(3A)  | 51.1(11)  |
| O(4)-La(2)-B(1)   | 101.0(4)  | B(3)-La(2)-B(1)    | 96.7(5)   |
| O(4)-La(2)-B(3)1  | 158.0(4)  | B(3)1-La(2)-B(1)   | 96.1(4)   |
| O(4)-La(2)-B(3)   | 28.4(3)   | B(3)1-La(2)-B(3)   | 135.8(3)  |
| O(4)-La(2)-O(3A)  | 105.9(18) | O(3A)-La(2)-B(1)   | 25.7(11)  |
| O(6)1-La(2)-B(1)  | 98.3(3)   | O(3A)-La(2)-B(3)   | 113.2(17) |
| O(6)1-La(2)-B(3)  | 108.4(3)  | La(3)6-La(3)-O(2)4 | 153.4(6)  |
| O(6)1-La(2)-B(3)1 | 27.7(3)   | La(3)6-La(3)-O(4)6 | 79.7(4)   |
| O(6)1-La(2)-O(3A) | 109.3(17) | La(3)6-La(3)-O(4)  | 87.1(4)   |
| O(8)-La(2)-O(1)1  | 82.9(3)   | La(3)6-La(3)-O(5)4 | 155.3(5)  |
| O(8)-La(2)-O(1)   | 136.9(3)  | La(3)6-La(3)-O(6)  | 88.9(5)   |
| O(8)-La(2)-O(3)   | 73.3(4)   | La(3)6-La(3)-O(6)6 | 78.0(5)   |
| O(8)-La(2)-O(4)   | 81.5(3)   | La(3)6-La(3)-O(7)7 | 82.92(5)  |
| O(8)-La(2)-O(6)1  | 134.9(3)  | La(3)6-La(3)-O(9)9 | 170.7(10) |
| O(8)-La(2)-O(10)5 | 79.2(4)   | La(3)6-La(3)-O(9)8 | 7.1(7)    |
| O(8)-La(2)-O(11)  | 126.8(3)  | La(3)6-La(3)-B(3)  | 89.9(5)   |
| O(8)-La(2)-B(1)   | 100.0(4)  | La(3)6-La(3)-B(3)6 | 78.8(5)   |
| O(8)-La(2)-B(3)   | 109.9(3)  | O(8)-La(2)-B(3)1   | 109.1(3)  |

---

---

|                   |          |                     |           |
|-------------------|----------|---------------------|-----------|
| O(2)4-La(3)-B(3)  | 108.1(6) | O(9)8-La(3)-O(2)4   | 152.7(10) |
| O(2)4-La(3)-B(3)6 | 98.1(6)  | O(9)9-La(3)-O(4)    | 101.2(9)  |
| O(4)6-La(3)-O(2)4 | 110.0(6) | O(9)8-La(3)-O(4)6   | 86.1(7)   |
| O(4)-La(3)-O(2)4  | 118.1(6) | O(9)9-La(3)-O(4)6   | 97.2(8)   |
| O(4)-La(3)-O(4)6  | 82.9(4)  | O(9)8-La(3)-O(4)    | 84.9(7)   |
| O(4)6-La(3)-O(5)4 | 82.8(6)  | O(9)8-La(3)-O(5)4   | 156.6(8)  |
| O(4)-La(3)-O(5)4  | 73.4(6)  | O(9)9-La(3)-O(5)4   | 30.0(10)  |
| O(4)-La(3)-O(6)   | 56.5(3)  | O(9)8-La(3)-O(6)6   | 84.1(6)   |
| O(4)6-La(3)-O(6)6 | 55.4(3)  | O(9)8-La(3)-O(6)    | 82.1(6)   |
| O(4)-La(3)-O(6)6  | 137.3(3) | O(9)9-La(3)-O(6)    | 99.1(8)   |
| O(4)-La(3)-B(3)6  | 110.8(3) | O(9)9-La(3)-O(6)6   | 93.0(8)   |
| O(4)6-La(3)-B(3)  | 111.5(3) | O(9)9-La(3)-O(7)7   | 93.4(9)   |
| O(4)-La(3)-B(3)   | 28.8(3)  | O(9)9-La(3)-O(9)8   | 173.4(15) |
| O(4)6-La(3)-B(3)6 | 28.1(3)  | O(9)8-La(3)-B(3)6   | 85.8(7)   |
| O(5)4-La(3)-O(2)4 | 50.5(8)  | O(9)9-La(3)-B(3)    | 99.3(9)   |
| O(5)4-La(3)-B(3)  | 80.4(6)  | O(9)8-La(3)-B(3)    | 84.7(6)   |
| O(5)4-La(3)-B(3)6 | 93.7(6)  | O(9)9-La(3)-B(3)6   | 94.3(8)   |
| O(6)6-La(3)-O(2)4 | 87.3(5)  | B(3)-La(3)-B(3)6    | 139.2(5)  |
| O(6)-La(3)-O(2)4  | 98.0(5)  | O(3)10-K(1)-O(3)    | 95.4(4)   |
| O(6)-La(3)-O(4)6  | 138.4(3) | O(3)10-K(1)-O(4)6   | 113.8(4)  |
| O(6)6-La(3)-O(5)4 | 105.9(6) | O(3)-K(1)-O(4)      | 78.4(4)   |
| O(6)-La(3)-O(5)4  | 92.8(6)  | O(3)10-K(1)-O(4)    | 163.1(6)  |
| O(6)-La(3)-O(6)6  | 159.2(3) | O(3)10-K(1)-O(5)9   | 75.5(7)   |
| O(6)-La(3)-B(3)6  | 163.1(4) | O(3)-K(1)-O(5)9     | 79.1(6)   |
| O(6)6-La(3)-B(3)  | 163.3(4) | O(3)10-K(1)-O(8)6   | 100.1(6)  |
| O(6)6-La(3)-B(3)6 | 27.3(3)  | O(3)-K(1)-O(10)10   | 139.8(5)  |
| O(6)-La(3)-B(3)   | 27.9(3)  | O(3)10-K(1)-O(10)10 | 49.8(5)   |
| O(7)7-La(3)-O(2)4 | 72.8(6)  | O(3)-K(1)-B(1)10    | 121.2(4)  |
| O(7)7-La(3)-O(4)  | 137.3(2) | O(3)10-K(1)-B(1)10  | 26.0(4)   |
| O(7)7-La(3)-O(4)6 | 135.1(2) | O(3)-K(1)-B(4)      | 84.7(4)   |
| O(7)7-La(3)-O(5)4 | 121.8(5) | O(3)10-K(1)-B(4)    | 104.7(6)  |
| O(7)7-La(3)-O(6)  | 81.8(2)  | O(3)-K(1)-O(3A)10   | 99.1(10)  |
| O(7)7-La(3)-O(6)6 | 80.6(2)  | O(3)10-K(1)-O(3A)10 | 13.1(10)  |
| O(7)7-La(3)-O(9)8 | 80.2(7)  | O(4)6-K(1)-O(3)     | 150.2(4)  |
| O(7)7-La(3)-B(3)  | 109.6(3) | O(4)6-K(1)-O(4)     | 71.9(3)   |
| O(7)7-La(3)-B(3)6 | 107.7(3) | O(4)6-K(1)-O(5)9    | 101.4(4)  |
| O(9)9-La(3)-O(2)4 | 20.7(10) | O(4)-K(1)-O(5)9     | 87.8(4)   |

---

---

|                    |           |                      |           |
|--------------------|-----------|----------------------|-----------|
| O(4)6-K(1)-O(10)10 | 69.4(3)   | O(10)10-K(1)-O(5)9   | 105.2(5)  |
| O(4)-K(1)-B(1)10   | 157.3(4)  | O(10)10-K(1)-B(1)10  | 25.4(3)   |
| O(4)6-K(1)-B(1)10  | 88.4(4)   | O(10)10-K(1)-B(4)    | 86.2(3)   |
| O(4)-K(1)-B(4)     | 90.5(3)   | O(10)10-K(1)-O(3A)10 | 42.3(11)  |
| O(4)6-K(1)-B(4)    | 93.4(3)   | B(1)10-K(1)-O(5)9    | 85.3(5)   |
| O(4)-K(1)-O(3A)10  | 175.9(14) | B(4)-K(1)-O(5)9      | 163.7(4)  |
| O(4)6-K(1)-O(3A)10 | 110.7(10) | B(4)-K(1)-B(1)10     | 102.0(4)  |
| O(5)4-K(1)-O(3)10  | 95.2(8)   | B(4)-K(1)-O(3A)10    | 92.5(13)  |
| O(5)4-K(1)-O(3)    | 89.6(7)   | O(1)-K(2)-La(1)5     | 147.0(2)  |
| O(5)4-K(1)-O(4)    | 69.3(6)   | O(1)-K(2)-O(6)1      | 74.1(3)   |
| O(5)4-K(1)-O(4)6   | 81.9(7)   | O(1)-K(2)-O(7)4      | 99.4(2)   |
| O(5)4-K(1)-O(5)9   | 23.5(8)   | O(1)-K(2)-O(8)4      | 70.4(3)   |
| O(5)4-K(1)-O(8)6   | 152.6(7)  | O(1)-K(2)-O(9)5      | 138.4(5)  |
| O(5)4-K(1)-O(8)    | 135.1(6)  | O(1)-K(2)-O(10)8     | 69.2(3)   |
| O(5)4-K(1)-O(10)10 | 110.2(6)  | O(1)-K(2)-O(10)5     | 72.6(3)   |
| O(5)4-K(1)-B(1)10  | 97.6(7)   | O(1)-K(2)-O(11)5     | 111.5(3)  |
| O(5)4-K(1)-B(4)    | 159.7(6)  | O(1)-K(2)-B(4)4      | 91.9(2)   |
| O(5)4-K(1)-O(3A)10 | 107.7(14) | O(1)-K(2)-O(3A)8     | 109.3(10) |
| O(8)-K(1)-O(3)     | 65.3(4)   | O(2)11-K(2)-La(1)5   | 55.4(7)   |
| O(8)6-K(1)-O(3)    | 111.2(4)  | O(2)11-K(2)-O(1)     | 156.2(8)  |
| O(8)-K(1)-O(3)10   | 122.4(5)  | O(2)11-K(2)-O(6)1    | 83.1(8)   |
| O(8)6-K(1)-O(4)    | 96.9(3)   | O(2)11-K(2)-O(7)4    | 65.2(6)   |
| O(8)-K(1)-O(4)6    | 101.5(3)  | O(2)11-K(2)-O(8)4    | 106.2(6)  |
| O(8)6-K(1)-O(4)6   | 71.2(3)   | O(2)11-K(2)-O(9)5    | 18.3(8)   |
| O(8)-K(1)-O(4)     | 69.5(2)   | O(2)11-K(2)-O(10)5   | 105.0(6)  |
| O(8)6-K(1)-O(5)9   | 169.3(5)  | O(2)11-K(2)-O(10)8   | 131.1(8)  |
| O(8)-K(1)-O(5)9    | 140.5(5)  | O(2)11-K(2)-O(11)5   | 79.3(6)   |
| O(8)-K(1)-O(8)6    | 50.0(3)   | O(2)11-K(2)-B(4)4    | 81.0(5)   |
| O(8)-K(1)-O(10)10  | 112.8(3)  | O(2)11-K(2)-O(3A)8   | 93.8(12)  |
| O(8)6-K(1)-O(10)10 | 65.3(3)   | O(6)1-K(2)-La(1)5    | 128.6(2)  |
| O(8)6-K(1)-B(1)10  | 86.8(4)   | O(6)1-K(2)-O(7)4     | 68.7(3)   |
| O(8)-K(1)-B(1)10   | 127.0(5)  | O(6)1-K(2)-O(8)4     | 96.4(3)   |
| O(8)-K(1)-B(4)     | 26.59(18) | O(6)1-K(2)-O(9)5     | 64.8(5)   |
| O(8)6-K(1)-B(4)    | 26.55(18) | O(6)1-K(2)-O(10)5    | 67.1(3)   |
| O(8)6-K(1)-O(3A)10 | 87.0(14)  | O(6)1-K(2)-O(10)8    | 141.8(3)  |
| O(8)-K(1)-O(3A)10  | 112.4(11) | O(6)1-K(2)-O(11)5    | 101.3(3)  |
| O(10)10-K(1)-O(4)  | 140.8(3)  | O(6)1-K(2)-B(4)4     | 89.7(3)   |

---



---

|                    |            |                    |           |
|--------------------|------------|--------------------|-----------|
| O(6)1-K(2)-O(3A)8  | 175.6(12)  | O(5)3-K(3)-O(9)    | 29.2(8)   |
| O(7)4-K(2)-La(1)5  | 110.83(9)  | O(5)3-K(3)-O(10)1  | 93.9(5)   |
| O(7)4-K(2)-O(8)4   | 47.7(2)    | O(5)-K(3)-O(10)1   | 104.6(6)  |
| O(7)4-K(2)-O(9)5   | 60.4(4)    | O(5)3-K(3)-O(10)   | 133.6(7)  |
| O(7)4-K(2)-O(10)8  | 106.9(3)   | O(5)-K(3)-O(10)    | 147.5(5)  |
| O(7)4-K(2)-O(10)5  | 135.6(3)   | O(5)3-K(3)-O(11)1  | 120.7(6)  |
| O(7)4-K(2)-O(11)5  | 143.7(3)   | O(5)-K(3)-O(11)1   | 110.5(5)  |
| O(7)4-K(2)-B(4)4   | 25.6(4)    | O(5)3-K(3)-O(11)   | 121.5(6)  |
| O(7)4-K(2)-O(3A)8  | 112.8(14)  | O(5)3-K(3)-B(1)1   | 97.2(6)   |
| O(8)4-K(2)-La(1)5  | 121.6(2)   | O(5)3-K(3)-B(1)    | 143.6(7)  |
| O(8)4-K(2)-O(9)5   | 107.0(4)   | O(5)-K(3)-B(1)     | 138.0(7)  |
| O(8)4-K(2)-O(10)8  | 61.6(3)    | O(5)-K(3)-B(1)1    | 96.1(6)   |
| O(8)4-K(2)-O(10)5  | 142.4(3)   | O(5)3-K(3)-B(2)    | 27.9(6)   |
| O(8)4-K(2)-O(11)5  | 162.1(3)   | O(5)-K(3)-B(2)     | 27.4(6)   |
| O(8)4-K(2)-B(4)4   | 25.5(3)    | O(5)-K(3)-O(3A)    | 145.2(11) |
| O(8)4-K(2)-O(3A)8  | 87.4(13)   | O(5)3-K(3)-O(3A)   | 165.6(12) |
| O(9)5-K(2)-La(1)5  | 71.3(4)    | O(9)-K(3)-O(2)3    | 21.7(7)   |
| O(10)8-K(2)-La(1)5 | 89.1(2)    | O(9)-K(3)-O(5)     | 48.6(6)   |
| O(10)5-K(2)-La(1)5 | 93.4(2)    | O(9)-K(3)-O(10)    | 105.2(6)  |
| O(10)5-K(2)-O(9)5  | 96.3(6)    | O(9)-K(3)-O(10)1   | 111.6(7)  |
| O(10)8-K(2)-O(9)5  | 148.1(5)   | O(9)-K(3)-O(11)1   | 148.7(7)  |
| O(10)5-K(2)-O(10)8 | 110.2(2)   | O(9)-K(3)-B(1)1    | 122.9(7)  |
| O(10)5-K(2)-B(4)4  | 154.7(3)   | O(9)-K(3)-B(1)     | 115.5(8)  |
| O(10)8-K(2)-B(4)4  | 81.3(4)    | O(9)-K(3)-B(2)     | 26.4(5)   |
| O(11)5-K(2)-La(1)5 | 47.20(19)  | O(9)-K(3)-O(3A)    | 139.0(13) |
| O(11)5-K(2)-O(9)5  | 83.6(4)    | O(10)-K(3)-O(10)1  | 103.4(3)  |
| O(11)5-K(2)-O(10)8 | 101.6(3)   | O(10)-K(3)-O(3A)   | 40.3(10)  |
| O(11)5-K(2)-O(10)5 | 46.3(3)    | O(11)1-K(3)-O(2)3  | 164.3(5)  |
| O(11)5-K(2)-B(4)4  | 156.1(2)   | O(11)-K(3)-O(2)3   | 77.6(6)   |
| O(11)5-K(2)-O(3A)8 | 75.1(14)   | O(11)-K(3)-O(5)    | 110.5(6)  |
| B(4)4-K(2)-La(1)5  | 109.64(10) | O(11)-K(3)-O(9)    | 98.6(7)   |
| B(4)4-K(2)-O(9)5   | 81.9(5)    | O(11)-K(3)-O(10)1  | 143.7(3)  |
| O(2)3-K(3)-O(10)   | 94.7(5)    | O(11)1-K(3)-O(10)  | 100.9(4)  |
| O(2)3-K(3)-O(10)1  | 133.2(7)   | O(11)-K(3)-O(10)   | 47.2(3)   |
| O(2)3-K(3)-O(3A)   | 120.4(13)  | O(11)1-K(3)-O(10)1 | 44.4(3)   |
| O(5)3-K(3)-O(2)3   | 45.9(8)    | O(11)-K(3)-O(11)1  | 111.9(2)  |
| O(5)3-K(3)-O(5)    | 28.5(9)    | O(11)-K(3)-B(1)1   | 138.4(4)  |

---

|                    |           |                    |           |
|--------------------|-----------|--------------------|-----------|
| O(11)-K(3)-B(1)    | 27.5(4)   | La(3)1-O(2)-K(3)3  | 88.8(9)   |
| O(11)-K(3)-B(2)    | 94.3(5)   | K(2)11-O(2)-La(1)  | 105.4(9)  |
| O(11)-K(3)-O(3A)   | 44.1(11)  | K(2)11-O(2)-La(1)3 | 75.1(8)   |
| O(11)1-K(3)-O(3A)  | 72.1(11)  | K(2)11-O(2)-La(3)1 | 89.0(7)   |
| B(1)1-K(3)-O(2)3   | 143.0(7)  | K(2)11-O(2)-K(3)3  | 84.6(6)   |
| B(1)-K(3)-O(2)3    | 97.8(7)   | O(9)3-O(2)-La(1)3  | 148(2)    |
| B(1)-K(3)-O(10)    | 25.6(3)   | O(9)3-O(2)-La(1)   | 97.7(19)  |
| B(1)1-K(3)-O(10)1  | 24.4(3)   | O(9)3-O(2)-La(3)1  | 36.2(15)  |
| B(1)-K(3)-O(10)1   | 116.8(5)  | O(9)3-O(2)-K(2)11  | 114(2)    |
| B(1)1-K(3)-O(10)   | 116.1(4)  | O(9)3-O(2)-K(3)3   | 66.7(18)  |
| B(1)1-K(3)-O(11)1  | 26.6(3)   | O(9)3-O(2)-B(2)    | 63.0(19)  |
| B(1)-K(3)-O(11)1   | 95.5(5)   | B(2)-O(2)-La(1)3   | 96.6(14)  |
| B(1)-K(3)-B(1)1    | 118.9(3)  | B(2)-O(2)-La(1)    | 97.2(11)  |
| B(1)-K(3)-O(3A)    | 23.6(12)  | B(2)-O(2)-La(3)1   | 96.2(18)  |
| B(1)1-K(3)-O(3A)   | 96.7(12)  | B(2)-O(2)-K(2)11   | 157.4(15) |
| B(2)-K(3)-O(2)3    | 26.4(6)   | B(2)-O(2)-K(3)3    | 73.6(12)  |
| B(2)-K(3)-O(10)    | 120.8(5)  | La(1)1-O(3)-K(3)4  | 169.6(5)  |
| B(2)-K(3)-O(10)1   | 121.7(5)  | La(2)-O(3)-La(1)1  | 81.3(5)   |
| B(2)-K(3)-O(11)1   | 137.9(5)  | La(2)-O(3)-K(1)    | 87.9(7)   |
| B(2)-K(3)-B(1)     | 119.4(8)  | La(2)-O(3)-K(1)10  | 152.3(12) |
| B(2)-K(3)-B(1)1    | 120.7(6)  | La(2)-O(3)-K(3)4   | 89.8(6)   |
| B(2)-K(3)-O(3A)    | 138.1(11) | K(1)10-O(3)-La(1)1 | 120.2(6)  |
| La(2)4-O(1)-La(1)  | 84.7(3)   | K(1)-O(3)-La(1)1   | 96.1(4)   |
| La(2)-O(1)-La(1)   | 87.8(3)   | K(1)10-O(3)-K(1)   | 73.5(6)   |
| La(2)-O(1)-La(2)4  | 172.0(4)  | K(1)10-O(3)-K(3)4  | 69.9(5)   |
| La(2)-O(1)-K(2)    | 89.0(3)   | K(1)-O(3)-K(3)4    | 88.9(8)   |
| La(2)4-O(1)-K(2)   | 92.3(3)   | B(1)-O(3)-La(1)1   | 114.1(18) |
| K(2)-O(1)-La(1)    | 77.5(3)   | B(1)-O(3)-La(2)    | 92.8(9)   |
| B(3)-O(1)-La(1)    | 157.5(8)  | B(1)-O(3)-K(1)     | 149.6(19) |
| B(3)-O(1)-La(2)    | 93.7(7)   | B(1)-O(3)-K(1)10   | 93.3(9)   |
| B(3)-O(1)-La(2)4   | 92.1(8)   | B(1)-O(3)-K(3)4    | 60.7(13)  |
| B(3)-O(1)-K(2)     | 124.9(8)  | La(2)-O(4)-La(3)6  | 175.7(4)  |
| La(1)-O(2)-La(1)3  | 109.9(11) | La(2)-O(4)-K(1)6   | 90.0(3)   |
| La(1)-O(2)-K(3)3   | 164.2(13) | La(2)-O(4)-K(1)    | 85.4(3)   |
| La(1)3-O(2)-K(3)3  | 84.3(6)   | La(3)-O(4)-La(2)   | 166.6(5)  |
| La(3)1-O(2)-La(1)  | 79.3(7)   | La(3)-O(4)-La(3)6  | 13.19(7)  |
| La(3)1-O(2)-La(1)3 | 163.1(9)  | La(3)6-O(4)-K(1)   | 91.3(3)   |

---

|                    |           |                      |           |
|--------------------|-----------|----------------------|-----------|
| La(3)-O(4)-K(1)6   | 95.8(3)   | La(1)4-O(6)-K(2)4    | 79.6(2)   |
| La(3)6-O(4)-K(1)6  | 86.6(3)   | La(2)4-O(6)-La(1)4   | 89.5(3)   |
| La(3)-O(4)-K(1)    | 84.1(3)   | La(2)4-O(6)-K(2)4    | 87.6(3)   |
| K(1)6-O(4)-K(1)    | 77.9(2)   | La(3)6-O(6)-La(1)4   | 91.6(3)   |
| B(3)-O(4)-La(2)    | 91.5(6)   | La(3)-O(6)-La(1)4    | 83.4(3)   |
| B(3)-O(4)-La(3)    | 91.6(7)   | La(3)-O(6)-La(2)4    | 171.6(5)  |
| B(3)-O(4)-La(3)6   | 92.7(7)   | La(3)6-O(6)-La(2)4   | 174.1(5)  |
| B(3)-O(4)-K(1)     | 141.7(9)  | La(3)-O(6)-La(3)6    | 13.09(7)  |
| B(3)-O(4)-K(1)6    | 140.4(9)  | La(3)6-O(6)-K(2)4    | 86.9(3)   |
| La(3)1-O(5)-K(1)12 | 159.9(8)  | La(3)-O(6)-K(2)4     | 95.4(3)   |
| La(3)1-O(5)-K(3)3  | 95.2(8)   | B(3)-O(6)-La(1)4     | 139.6(9)  |
| La(3)1-O(5)-K(3)   | 108.7(8)  | B(3)-O(6)-La(2)4     | 90.2(7)   |
| K(1)1-O(5)-La(3)1  | 92.1(7)   | B(3)-O(6)-La(3)      | 92.3(7)   |
| K(1)1-O(5)-K(1)12  | 70.0(7)   | B(3)-O(6)-La(3)6     | 92.7(7)   |
| K(1)1-O(5)-K(3)3   | 86.5(7)   | B(3)-O(6)-K(2)4      | 140.8(9)  |
| K(1)1-O(5)-K(3)    | 107.9(9)  | La(1)13-O(7)-La(1)1  | 177.0(4)  |
| K(3)3-O(5)-K(1)12  | 92.6(8)   | La(1)1-O(7)-K(2)1    | 78.10(8)  |
| K(3)-O(5)-K(1)12   | 70.3(6)   | La(1)1-O(7)-K(2)13   | 101.76(8) |
| K(3)3-O(5)-K(3)    | 151.1(9)  | La(1)13-O(7)-K(2)13  | 78.10(8)  |
| O(5)3-O(5)-La(3)1  | 155.3(5)  | La(1)13-O(7)-K(2)1   | 101.76(8) |
| O(5)3-O(5)-K(1)1   | 112.3(7)  | La(3)14-O(7)-La(1)1  | 96.5(2)   |
| O(5)3-O(5)-K(1)12  | 44.3(4)   | La(3)15-O(7)-La(1)13 | 96.5(2)   |
| O(5)3-O(5)-K(3)    | 68.8(18)  | La(3)14-O(7)-La(1)13 | 86.5(2)   |
| O(5)3-O(5)-K(3)3   | 82.7(19)  | La(3)15-O(7)-La(1)1  | 86.5(2)   |
| O(9)3-O(5)-La(3)1  | 42.2(13)  | La(3)15-O(7)-La(3)14 | 14.16(9)  |
| O(9)3-O(5)-K(1)12  | 157.8(16) | La(3)15-O(7)-K(2)1   | 96.5(2)   |
| O(9)3-O(5)-K(1)1   | 127.7(17) | La(3)14-O(7)-K(2)13  | 96.5(2)   |
| O(9)3-O(5)-K(3)3   | 77.0(14)  | La(3)14-O(7)-K(2)1   | 88.9(2)   |
| O(9)3-O(5)-K(3)    | 110.1(16) | La(3)15-O(7)-K(2)13  | 88.9(2)   |
| O(9)3-O(5)-O(5)3   | 114.2(15) | K(2)13-O(7)-K(2)1    | 174.6(4)  |
| B(2)-O(5)-La(3)1   | 95.7(15)  | B(4)-O(7)-La(1)13    | 88.5(2)   |
| B(2)-O(5)-K(1)1    | 168.5(17) | B(4)-O(7)-La(1)1     | 88.5(2)   |
| B(2)-O(5)-K(1)12   | 103.4(13) | B(4)-O(7)-La(3)14    | 172.92(5) |
| B(2)-O(5)-K(3)     | 77.6(10)  | B(4)-O(7)-La(3)15    | 172.92(5) |
| B(2)-O(5)-K(3)3    | 84.4(10)  | B(4)-O(7)-K(2)13     | 87.3(2)   |
| B(2)-O(5)-O(5)3    | 59.6(13)  | B(4)-O(7)-K(2)1      | 87.3(2)   |
| B(2)-O(5)-O(9)3    | 56.6(15)  | La(1)1-O(8)-K(1)     | 104.7(4)  |

---

---

|                      |           |                     |           |
|----------------------|-----------|---------------------|-----------|
| La(1)1-O(8)-K(1)6    | 172.3(4)  | La(2)2-O(10)-K(2)16 | 87.6(4)   |
| La(1)1-O(8)-K(2)1    | 78.0(2)   | La(2)2-O(10)-K(3)4  | 110.7(6)  |
| La(2)-O(8)-La(1)1    | 91.0(3)   | La(2)2-O(10)-K(3)   | 116.1(4)  |
| La(2)-O(8)-K(1)6     | 93.4(3)   | K(1)10-O(10)-K(2)2  | 132.6(6)  |
| La(2)-O(8)-K(1)      | 92.9(3)   | K(1)10-O(10)-K(2)16 | 88.8(4)   |
| La(2)-O(8)-K(2)1     | 92.4(3)   | K(1)10-O(10)-K(3)   | 145.5(5)  |
| K(1)-O(8)-K(1)6      | 81.4(2)   | K(1)10-O(10)-K(3)4  | 69.4(3)   |
| K(1)6-O(8)-K(2)1     | 95.6(3)   | K(2)2-O(10)-K(2)16  | 137.6(4)  |
| K(1)-O(8)-K(2)1      | 174.0(3)  | K(2)2-O(10)-K(3)4   | 69.1(3)   |
| B(4)-O(8)-La(1)1     | 89.1(7)   | K(2)2-O(10)-K(3)    | 75.7(2)   |
| B(4)-O(8)-La(2)      | 179.0(7)  | K(2)16-O(10)-K(3)   | 70.6(4)   |
| B(4)-O(8)-K(1)6      | 86.4(6)   | K(2)16-O(10)-K(3)4  | 150.6(4)  |
| B(4)-O(8)-K(1)       | 88.0(6)   | K(3)-O(10)-K(3)4    | 117.0(4)  |
| B(4)-O(8)-K(2)1      | 86.6(6)   | B(1)-O(10)-La(2)2   | 174.2(14) |
| La(3)12-O(9)-La(3)16 | 2.2(2)    | B(1)-O(10)-K(1)10   | 87.7(7)   |
| La(3)16-O(9)-K(2)2   | 86.4(7)   | B(1)-O(10)-K(2)16   | 97.3(12)  |
| La(3)12-O(9)-K(2)2   | 88.4(8)   | B(1)-O(10)-K(2)2    | 93.6(10)  |
| La(3)16-O(9)-K(3)    | 115.1(9)  | B(1)-O(10)-K(3)     | 68.7(8)   |
| La(3)12-O(9)-K(3)    | 116.5(11) | B(1)-O(10)-K(3)4    | 63.5(11)  |
| K(3)-O(9)-K(2)2      | 78.2(6)   | La(1)-O(11)-K(2)2   | 73.5(3)   |
| O(2)3-O(9)-La(3)12   | 123(2)    | La(1)-O(11)-K(3)4   | 99.5(3)   |
| O(2)3-O(9)-La(3)16   | 122(2)    | La(1)-O(11)-K(3)    | 95.9(3)   |
| O(2)3-O(9)-K(2)2     | 48.0(16)  | La(2)-O(11)-La(1)   | 94.5(3)   |
| O(2)3-O(9)-K(3)      | 91.5(19)  | La(2)-O(11)-K(2)2   | 165.2(4)  |
| O(2)3-O(9)-O(5)3     | 128(2)    | La(2)-O(11)-K(3)4   | 99.9(4)   |
| O(2)3-O(9)-B(2)      | 68(2)     | La(2)-O(11)-K(3)    | 107.3(4)  |
| O(5)3-O(9)-La(3)16   | 109.3(19) | K(3)4-O(11)-K(2)2   | 74.2(3)   |
| O(5)3-O(9)-La(3)12   | 108(2)    | K(3)-O(11)-K(2)2    | 83.1(3)   |
| O(5)3-O(9)-K(2)2     | 151.6(17) | K(3)-O(11)-K(3)4    | 147.5(4)  |
| O(5)3-O(9)-K(3)      | 73.8(14)  | B(1)-O(11)-La(1)    | 169.7(9)  |
| B(2)-O(9)-La(3)12    | 154.7(19) | B(1)-O(11)-La(2)    | 95.2(8)   |
| B(2)-O(9)-La(3)16    | 156.8(17) | B(1)-O(11)-K(2)2    | 96.4(8)   |
| B(2)-O(9)-K(2)2      | 111.6(19) | B(1)-O(11)-K(3)     | 84.5(10)  |
| B(2)-O(9)-K(3)       | 83.9(12)  | B(1)-O(11)-K(3)4    | 75.4(10)  |
| B(2)-O(9)-O(5)3      | 61.5(18)  | La(2)-B(1)-K(1)10   | 114.8(4)  |
| La(2)2-O(10)-K(1)10  | 89.4(3)   | La(2)-B(1)-K(2)2    | 117.5(5)  |
| La(2)2-O(10)-K(2)2   | 84.7(4)   | La(2)-B(1)-K(2)16   | 117.3(6)  |

---

---

|                    |           |                     |           |
|--------------------|-----------|---------------------|-----------|
| K(1)10-B(1)-K(2)2  | 112.2(5)  | La(3)12-B(2)-La(3)1 | 176.7(10) |
| K(1)10-B(1)-K(2)16 | 77.5(4)   | K(3)-B(2)-La(3)12   | 82.2(2)   |
| K(2)2-B(1)-K(2)16  | 111.0(4)  | K(3)-B(2)-La(3)1    | 96.6(2)   |
| K(3)-B(1)-La(2)    | 91.6(4)   | K(3)3-B(2)-La(3)1   | 82.2(2)   |
| K(3)4-B(1)-La(2)   | 91.0(6)   | K(3)3-B(2)-La(3)12  | 96.6(2)   |
| K(3)-B(1)-K(1)10   | 142.9(7)  | K(3)-B(2)-K(3)3     | 136.6(10) |
| K(3)4-B(1)-K(1)10  | 70.8(4)   | O(2)-B(2)-La(3)12   | 124.9(17) |
| K(3)4-B(1)-K(2)16  | 144.4(4)  | O(2)3-B(2)-La(3)1   | 124.9(17) |
| K(3)-B(1)-K(2)16   | 67.0(4)   | O(2)-B(2)-La(3)1    | 58.0(14)  |
| K(3)4-B(1)-K(2)2   | 68.4(4)   | O(2)3-B(2)-La(3)12  | 58.0(14)  |
| K(3)-B(1)-K(2)2    | 73.0(3)   | O(2)3-B(2)-K(3)     | 80.0(10)  |
| K(3)-B(1)-K(3)4    | 137.6(6)  | O(2)-B(2)-K(3)3     | 80.0(10)  |
| O(3)-B(1)-La(2)    | 59.5(8)   | O(2)3-B(2)-K(3)3    | 135.4(11) |
| O(3)-B(1)-K(1)10   | 60.6(8)   | O(2)-B(2)-K(3)      | 135.4(11) |
| O(3)-B(1)-K(2)16   | 83.0(15)  | O(2)3-B(2)-O(2)     | 86(3)     |
| O(3)-B(1)-K(2)2    | 163.3(18) | O(2)-B(2)-O(5)3     | 155.0(15) |
| O(3)-B(1)-K(3)     | 122.4(16) | O(2)3-B(2)-O(5)     | 155.0(15) |
| O(3)-B(1)-K(3)4    | 94.9(15)  | O(2)-B(2)-O(5)      | 110.6(18) |
| O(10)-B(1)-La(2)   | 176.9(14) | O(2)3-B(2)-O(5)3    | 110.6(18) |
| O(10)-B(1)-K(1)10  | 67.0(6)   | O(5)-B(2)-La(3)12   | 118.8(15) |
| O(10)-B(1)-K(2)2   | 63.1(9)   | O(5)-B(2)-La(3)1    | 58.0(11)  |
| O(10)-B(1)-K(2)16  | 60.2(11)  | O(5)3-B(2)-La(3)1   | 118.8(15) |
| O(10)-B(1)-K(3)4   | 92.0(12)  | O(5)3-B(2)-La(3)12  | 58.0(11)  |
| O(10)-B(1)-K(3)    | 85.7(9)   | O(5)3-B(2)-K(3)3    | 75.1(12)  |
| O(10)-B(1)-O(3)    | 120.9(14) | O(5)-B(2)-K(3)      | 75.1(12)  |
| O(10)-B(1)-O(11)   | 122.2(13) | O(5)-B(2)-K(3)3     | 67.7(11)  |
| O(11)-B(1)-La(2)   | 57.8(6)   | O(5)3-B(2)-K(3)     | 67.7(11)  |
| O(11)-B(1)-K(1)10  | 147.9(14) | O(5)3-B(2)-O(5)     | 61(3)     |
| O(11)-B(1)-K(2)16  | 134.5(11) | O(9)3-B(2)-La(3)12  | 165.4(11) |
| O(11)-B(1)-K(2)2   | 60.4(7)   | O(9)-B(2)-La(3)1    | 165.4(11) |
| O(11)-B(1)-K(3)4   | 78.0(11)  | O(9)3-B(2)-La(3)1   | 14.9(11)  |
| O(11)-B(1)-K(3)    | 67.9(8)   | O(9)-B(2)-La(3)12   | 14.9(11)  |
| O(11)-B(1)-O(3)    | 116.6(12) | O(9)3-B(2)-K(3)     | 111.2(13) |
| O(3A)-B(1)-La(2)   | 67(2)     | O(9)-B(2)-K(3)      | 69.7(11)  |
| O(3A)-B(1)-K(3)    | 91(4)     | O(9)-B(2)-O(2)3     | 49.3(16)  |
| O(3A)-B(1)-O(10)   | 112(3)    | O(9)3-B(2)-O(2)     | 49.3(16)  |
| O(3A)-B(1)-O(11)   | 119(3)    | O(9)-B(2)-O(2)      | 128(3)    |

---

---

|                    |           |                     |           |
|--------------------|-----------|---------------------|-----------|
| O(9)3-B(2)-O(2)3   | 128(3)    | O(6)-B(3)-La(3)6    | 60.0(6)   |
| O(9)-B(2)-O(5)     | 120(3)    | O(6)-B(3)-La(3)     | 59.8(6)   |
| O(9)3-B(2)-O(5)    | 62.0(18)  | O(6)-B(3)-K(3)8     | 87.9(8)   |
| O(9)-B(2)-O(5)3    | 62.0(18)  | O(6)-B(3)-K(3)4     | 92.2(8)   |
| O(9)3-B(2)-O(5)3   | 120(3)    | O(6)-B(3)-O(4)      | 118.9(11) |
| O(9)3-B(2)-O(9)    | 178(4)    | La(1)1-B(4)-La(1)13 | 129.6(6)  |
| La(2)4-B(3)-La(2)  | 119.1(4)  | La(1)1-B(4)-K(2)1   | 70.31(19) |
| La(2)4-B(3)-La(3)6 | 121.8(4)  | La(1)13-B(4)-K(2)13 | 70.31(19) |
| La(2)-B(3)-La(3)6  | 119.1(4)  | La(1)13-B(4)-K(2)1  | 90.3(3)   |
| La(2)-B(3)-K(3)8   | 96.2(4)   | La(1)1-B(4)-K(2)13  | 90.3(3)   |
| La(2)-B(3)-K(3)4   | 83.6(3)   | K(1)6-B(4)-La(1)1   | 131.0(3)  |
| La(2)4-B(3)-K(3)8  | 96.9(4)   | K(1)-B(4)-La(1)1    | 91.56(14) |
| La(2)4-B(3)-K(3)4  | 84.2(4)   | K(1)-B(4)-La(1)13   | 131.0(3)  |
| La(3)-B(3)-La(2)4  | 121.3(4)  | K(1)6-B(4)-La(1)13  | 91.56(14) |
| La(3)-B(3)-La(2)   | 118.4(4)  | K(1)6-B(4)-K(1)     | 73.4(4)   |
| La(3)-B(3)-La(3)6  | 11.32(7)  | K(1)6-B(4)-K(2)1    | 86.54(13) |
| La(3)6-B(3)-K(3)8  | 76.8(3)   | K(1)-B(4)-K(2)13    | 86.54(13) |
| La(3)-B(3)-K(3)4   | 90.8(4)   | K(1)-B(4)-K(2)1     | 133.2(3)  |
| La(3)-B(3)-K(3)8   | 88.1(4)   | K(1)6-B(4)-K(2)13   | 133.2(3)  |
| La(3)6-B(3)-K(3)4  | 102.2(4)  | K(2)1-B(4)-K(2)13   | 134.2(6)  |
| K(3)8-B(3)-K(3)4   | 178.7(5)  | O(7)-B(4)-La(1)13   | 64.8(3)   |
| O(1)-B(3)-La(2)    | 59.0(6)   | O(7)-B(4)-La(1)1    | 64.8(3)   |
| O(1)-B(3)-La(2)4   | 60.3(6)   | O(7)-B(4)-K(1)      | 143.3(2)  |
| O(1)-B(3)-La(3)6   | 174.7(10) | O(7)-B(4)-K(1)6     | 143.3(2)  |
| O(1)-B(3)-La(3)    | 173.2(10) | O(7)-B(4)-K(2)1     | 67.1(3)   |
| O(1)-B(3)-K(3)8    | 98.3(8)   | O(7)-B(4)-K(2)13    | 67.1(3)   |
| O(1)-B(3)-K(3)4    | 82.7(7)   | O(8)6-B(4)-La(1)13  | 64.3(5)   |
| O(1)-B(3)-O(4)     | 118.7(11) | O(8)-B(4)-La(1)13   | 149.6(5)  |
| O(1)-B(3)-O(6)     | 122.3(12) | O(8)-B(4)-La(1)1    | 64.3(5)   |
| O(4)-B(3)-La(2)    | 60.0(6)   | O(8)6-B(4)-La(1)1   | 149.6(5)  |
| O(4)-B(3)-La(2)4   | 179.1(9)  | O(8)-B(4)-K(1)      | 65.4(6)   |
| O(4)-B(3)-La(3)6   | 59.1(6)   | O(8)6-B(4)-K(1)     | 67.1(7)   |
| O(4)-B(3)-La(3)    | 59.6(6)   | O(8)6-B(4)-K(1)6    | 65.4(6)   |
| O(4)-B(3)-K(3)8    | 83.2(8)   | O(8)-B(4)-K(1)6     | 67.1(7)   |
| O(4)-B(3)-K(3)4    | 95.6(8)   | O(8)-B(4)-K(2)13    | 140.1(5)  |
| O(6)-B(3)-La(2)4   | 62.0(6)   | O(8)-B(4)-K(2)1     | 67.9(4)   |
| O(6)-B(3)-La(2)    | 175.5(10) | O(8)6-B(4)-K(2)1    | 140.1(5)  |

---

|                     |           |                     |           |
|---------------------|-----------|---------------------|-----------|
| O(8)-B(4)-K(2)1     | 67.9(4)   | La(2)-O(3A)-K(3)    | 90.1(16)  |
| O(8)6-B(4)-K(2)1    | 140.1(5)  | K(1)10-O(3A)-K(3)   | 130.1(18) |
| O(8)6-B(4)-K(2)13   | 67.9(4)   | K(2)16-O(3A)-K(1)10 | 86.0(13)  |
| O(8)-B(4)-O(7)      | 120.2(7)  | K(2)16-O(3A)-K(3)   | 70.3(18)  |
| O(8)6-B(4)-O(7)     | 120.2(7)  | B(1)-O(3A)-La(1)1   | 157(5)    |
| O(8)6-B(4)-O(8)     | 119.6(14) | B(1)-O(3A)-La(2)    | 88(3)     |
| La(1)1-O(3A)-La(2)  | 86.8(16)  | B(1)-O(3A)-K(1)10   | 79(3)     |
| La(1)1-O(3A)-K(1)10 | 122.0(18) | B(1)-O(3A)-K(2)16   | 103(4)    |
| La(1)1-O(3A)-K(2)16 | 73.2(18)  | B(1)-O(3A)-K(3)     | 65(3)     |
| La(1)1-O(3A)-K(3)   | 93(3)     | O(8)-B(4)-K(2)1     | 67.9(4)   |
| La(2)-O(3A)-K(1)10  | 123(3)    | O(8)6-B(4)-K(2)1    | 140.1(5)  |
| La(2)-O(3A)-K(2)16  | 151(3)    |                     |           |

Symmetry transformations used to generate equivalent atoms:

- #1  $x, -y-1/2, z+1/2$     #2  $x+1, y, z$     #3  $-x-1, -y, z$   
#4  $x, -y-1/2, z-1/2$     #5  $x-1, y, z$     #6  $-x-2, -y-1, z$   
#7  $x, y, z-1$     #8  $x-1, -y-1/2, z-1/2$     #9  $-x-1, y-1/2, z-1/2$   
#10  $-x-1, -y-1, z$     #11  $-x-2, -y, z$     #12  $-x-1, y+1/2, z+1/2$   
#13  $-x-2, y-1/2, z+1/2$     #14  $-x-2, -y-1, z+1$     #15  $x, y, z+1$   
#16  $x+1, -y-1/2, z+1/2$

Table S4. Atomic coordinates equivalent isotropic displacement parameters ( $\text{\AA}^2$ ) for  $K_2$ .  $U_{\text{eq}}$  is defined as one-third of the trace of the orthogonalized  $U_{ij}$  tensor.

| Atoms | x        | y        | z        | $U_{\text{eq}}$ |
|-------|----------|----------|----------|-----------------|
| La(1) | 10000    | 7135(1)  | 9536(2)  | 17(1)           |
| K(1)  | 5000     | 5000     | 516(17)  | 52(2)           |
| K(2)  | 5000     | 5000     | 5634(10) | 32(1)           |
| Na(1) | 0        | 5000     | 3060(18) | 24(2)           |
| O(1)  | 10000    | 3963(9)  | 6340(20) | 19(2)           |
| O(2)  | 2671(16) | 3441(8)  | 2428(15) | 20(2)           |
| O(3)  | 5000     | 1844(16) | 3660(20) | 23(2)           |
| O(4)  | 10000    | 5000     | 9210(30) | 19(5)           |
| B(1)  | 10000    | 5000     | 7320(50) | 20(5)           |
| B(2)  | 5000     | 2898(13) | 2770(40) | 18(5)           |



Table S5. Atomic coordinates equivalent isotropic displacement parameters ( $\text{\AA}^2$ ) for  $K_3$ .  $U_{eq}$  is defined as one-third of the trace of the orthogonalized  $U_{ij}$  tensor.

| Atoms | x        | y        | z        | $U_{eq}$ |
|-------|----------|----------|----------|----------|
| La(1) | 7066(3)  | 1138(1)  | 5397(2)  | 45(1)    |
| La(2) | 8988(1)  | 3058(1)  | 3730(1)  | 17(1)    |
| La(3) | 9569(2)  | 5005(2)  | 7835(1)  | 17(1)    |
| K(1)  | 7399(4)  | 5216(1)  | 4305(3)  | 21(1)    |
| K(2)  | 12209(4) | 1506(2)  | 5464(4)  | 34(1)    |
| K(3)  | 4465(8)  | 1650(2)  | 1782(3)  | 58(1)    |
| O(1)  | 9194(12) | 2565(6)  | 6263(10) | 22(2)    |
| O(2)  | 6100(40) | 338(13)  | 3980(30) | 57(8)    |
| O(3)  | 5620(20) | 3770(11) | 3400(30) | 46(5)    |
| O(4)  | 9689(17) | 3983(5)  | 5847(9)  | 32(2)    |
| O(5)  | 6030(30) | 2(14)    | 1670(30) | 54(7)    |
| O(6)  | 9542(16) | 3479(5)  | 8212(9)  | 31(2)    |
| O(7)  | 10000    | 5000     | 321(11)  | 24(3)    |
| O(8)  | 9618(15) | 4306(5)  | 2470(8)  | 27(2)    |
| O(9)  | 3130(30) | 204(15)  | 2960(30) | 48(6)    |
| O(10) | 2563(16) | 3042(6)  | 3628(18) | 51(3)    |
| O(11) | 5635(15) | 2415(6)  | 4215(11) | 38(2)    |
| B(1)  | 4569(19) | 3059(8)  | 3710(20) | 26(2)    |
| B(2)  | 5000     | 0        | 2930(30) | 29(4)    |
| B(3)  | 9470(20) | 3327(8)  | 6793(14) | 20(3)    |
| B(4)  | 10000    | 5000     | 1753(18) | 17(3)    |
| O(3A) | 5340(80) | 3520(40) | 2730(80) | 33(12)   |

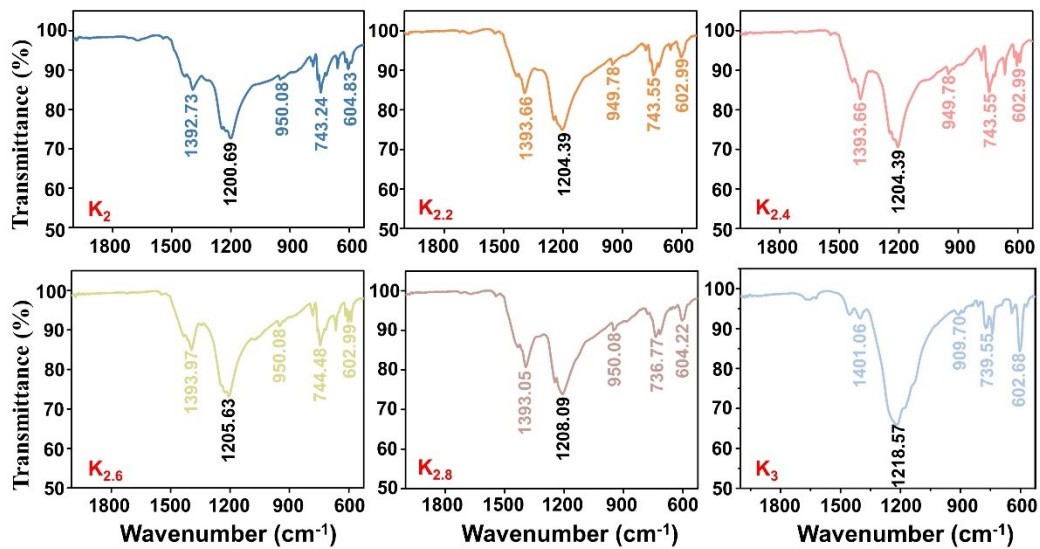

Fig. S1 IR spectrum of the title polycrystalline samples.

Table S6. Comparison of the reported SHG intensity of alkali/alkaline earth metal rare earth borates containing [BO<sub>3</sub>] units.

| Compounds                                                                      | Space group  | SHG (×KDP) | UV cutoff edge (nm) |
|--------------------------------------------------------------------------------|--------------|------------|---------------------|
| Na <sub>3</sub> Gd <sub>2</sub> (BO <sub>3</sub> ) <sub>3</sub>                | <i>Amm2</i>  | 1.3        | 207                 |
| Na <sub>3</sub> La <sub>2</sub> (BO <sub>3</sub> ) <sub>3</sub>                | <i>Amm2</i>  | 2.0        | 213                 |
| Na <sub>3</sub> La <sub>9</sub> O <sub>3</sub> (BO <sub>3</sub> ) <sub>8</sub> | <i>P62m</i>  | 6.0        | 270                 |
| BaYOB <sub>3</sub>                                                             | <i>P62m</i>  | 2.6        | 190                 |
| KNa <sub>2</sub> La <sub>2</sub> (BO <sub>3</sub> ) <sub>3</sub>               | <i>Amm2</i>  | 2.6        | 212                 |
| K <sub>5</sub> Mg <sub>2</sub> La <sub>3</sub> (BO <sub>3</sub> ) <sub>6</sub> | <i>P31m</i>  | 3.1        | 200                 |
| Na <sub>3</sub> Y <sub>3</sub> (BO <sub>3</sub> ) <sub>4</sub>                 | <i>P63mc</i> | 2.4        | 253                 |
| Na <sub>3</sub> Nd <sub>9</sub> O <sub>3</sub> (BO <sub>3</sub> ) <sub>8</sub> | <i>P62m</i>  | 3.0        | 230                 |
| YCa <sub>4</sub> O(BO <sub>3</sub> )                                           | <i>Cm</i>    | 2.0        | 220                 |
| LaCa <sub>4</sub> O(BO <sub>3</sub> )                                          | <i>Cm</i>    | 3.0        | 210                 |
| GdCa <sub>4</sub> O(BO <sub>3</sub> )                                          | <i>Cm</i>    | 3.4        | 200                 |
| TmCa <sub>4</sub> O(BO <sub>3</sub> )                                          | <i>Cm</i>    | 2.8        | 254                 |

## REFERENCES

- 1 G. M. Sheldrick, SHELXS-97, Program for the Solution of Crystal Structures, 1997.
- 2 A. L. Spek, Single-crystal structure validation with the program PLATON, *J. Appl. Crystallogr.*, 2003, **36**, 7-13.
- 3 S. K. Kurtz and T. T. Perry, A Powder Technique for the Evaluation of Nonlinear Optical Materials, *J. Appl. Phys.*, 1968, **39**, 3798-3813.
- 4 P. Kubelka and F. Munk, An Article on Optics of Paint Layers, *Z. Tech. Physical*, 1931, **12**, 593.
- 5 W. Q. Huang, X. Zhang, Y. Q. Li, Y. Zhou, X. Chen, X. Q. Li, F. F. Wu, M. C. Hong, J. H. Luo and S. G. Zhao, A Hybrid Halide Perovskite Birefringent Crystal, *Angew Chem Int Ed*, 2022, **61**, e202202746.
- 6 S. J. Clark, M. D. Segall, C. J. Pickard, P. J. Hasnip, M. J. Probert, K. Refson and M. C. Payne, First principles methods using CASTEP, *Z. Kristallogr.*, 2005, **220**, 567-570.
- 7 M. Ernzerhof and G. E. Scuseria, Assessment of the Perdew-Burke-Ernzerhof exchange-correlation functional, *J. Chem. Phys.*, 1999, **110**, 5029-5036.
